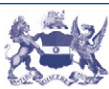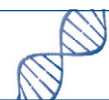

## Patterns and processes in the evolutionary history of parrotfishes (Family Labridae)

JOHN. H. CHOAT<sup>1\*</sup>, OYA. S. KLANTEN<sup>1†</sup>, LYNNE VAN HERWERDEN<sup>1</sup>,  
D. ROSS ROBERTSON<sup>2‡</sup> and KENDALL D. CLEMENTS<sup>3</sup>

<sup>1</sup>*School of Tropical and Marine Biology, James Cook University, Townsville, QLD, 4811, Australia*

<sup>2</sup>*Smithsonian Tropical Research Institute, Ancon, Balboa, Republic of Panama*

<sup>3</sup>*School of Biological Sciences, University of Auckland, Private Bag 92019, Auckland 1142, New Zealand*

*Received 5 March 2012; revised 23 May 2012; accepted for publication 23 May 2012*

Phylogenetic reconstruction of the evolutionary relationships among 61 of the 70 species of the parrotfish genera *Chlorurus* and *Scarus* (Family Labridae) based on mitochondrial and nuclear gene sequences retrieved 15 well-supported clades with mid Pliocene/Pleistocene diversification. Twenty-two reciprocally monophyletic sister-species pairs were identified: 64% were allopatric, and the remainder were sympatric. Age of divergence was similar for allopatric and sympatric species pairs. Sympatric sister pairs displayed greater divergence in morphology, ecology, and sexually dimorphic colour patterns than did allopatric pairs, suggesting that both genetic drift in allopatric species pairs and ecologically adaptive divergence between members of sympatric pairs have played a role in diversification. Basal species typically have small geographical ranges and are restricted to geographically and ecologically peripheral reef habitats. We found little evidence that a single dominant process has driven diversification, nor did we detect a pattern of discrete, sequential stages of diversification in relation to habitat, ecology, and reproductive biology. The evolution of *Chlorurus* and *Scarus* has been complex, involving a number of speciation processes. © 2012 The Linnean Society of London, *Biological Journal of the Linnean Society*, 2012, **107**, 529–557.

**ADDITIONAL KEYWORDS:** adaptive radiation – evolution – sexual selection – speciation – reef fish.

### INTRODUCTION

Adaptive radiations are episodes of phenotypic diversification in rapidly multiplying lineages that result in ecologically divergent groups of species (Schluter, 2000). A pervasive theme in the vertebrate literature concerns the concept of radiation as a series of stages, in which diversification proceeds through discrete sequences of phenotypic differentiation (Streelman *et al.*, 2002; Streelman & Danley, 2003; Sallan & Friedman, 2012). The most relevant example in this context is the model of radiation by stages in which different vertebrate radiations follow similar evolu-

tionary trajectories, diverging sequentially along axes of habitat, trophic morphology, and communication (Streelman & Danley, 2003). Under this model, the first two stages (ecological) are driven by natural selection, and the third (reproductive) is driven by sexual selection (Streelman & Danley, 2003). One of the primary exemplars for this model of adaptive radiation was the evolution of parrotfishes, comprising a speciose group of fishes confined largely to coral reefs (Streelman *et al.*, 2002; Streelman & Danley, 2003). As a result, the processes of sequential diversification under this radiation in stages model have been applied to the evolution of reef fish faunas, especially the Labridae (Smith *et al.*, 2008; Kazancioglu *et al.*, 2009). However, recent studies suggest that aspects of this model require reconsideration. First, the concept of sequential action of natural and sexual selection could be profitably re-examined to

\*Corresponding author. E-mail: john.choat@jcu.edu.au

†Current address: School of Medicine, The University of Sydney, Building F13, Sydney, NSW 2006, Australia

‡Mailing address: STRI, Unit 0948, APO AA 34002, USA

determine whether these processes are contemporaneous and interacting, rather than separate in time (The Marie Curie Speciation Network\*, 2012). Second, explicit tests have questioned the concept of radiation in stages (Sallan & Friedman, 2012). Third, the extent to which alternative evolutionary processes such as neutral divergence after geographical isolation have been important in the evolution of parrotfishes requires further examination (Robertson *et al.*, 2006). The main aim of the present study was to examine the pattern of species-level divergences in the most speciose clades of parrotfishes aiming to determine the extent to which they conform to a model of adaptive radiation as an explanation for the diversity of this group.

The parrotfishes are a clade of speciose (ten genera, 99 recognized species; Parenti & Randall, (2011) but morphologically uniform (Bellwood, 1994) perciform fishes notable both for their abundance on present day tropical reef systems and their presumed functional importance (Bellwood & Wainwright, 2002). They were previously recognized as a distinct family, the Scaridae, closely related to the Labridae and comprising two sub-familial groups: the scarines and sparismatines. Phylogenetic analysis (Westneat & Alfaro, 2005) revealed that the parrotfishes are nested within a monophyletic Labridae and are sister to cheiline labrids. Parrotfishes (scarinae) are therefore referred to as scarine labrids in the present study.

The most speciose elements of this taxon, the genera *Scarus*, *Chlorurus*, and *Sparisoma*, display a pattern of recent diversification that is restricted largely to the last 3.5 million years (Robertson *et al.*, 2006; Smith *et al.*, 2008; Alfaro *et al.*, 2009). The distribution of diversity is uneven in terms of taxonomic structure and biogeography. A single genus, *Scarus*, accounts for over 50% of the species, and 70% of all known scarines occur in the Tropical East Pacific and Indo-West Pacific biogeographical regions (Parenti & Randall, 2000, 2011). Parrotfish are relatively uniform in terms of morphology and foraging modes, usually grazing in multi-specific schools over rock and calcareous substrata, (Bellwood & Choat, 1990; Bellwood, 1994). This morphological uniformity contrasts with the complex reproductive biology of parrotfishes; most are protogynous hermaphrodites, with many taxa manifesting distinctive sexually dimorphic colour patterns (Choat & Robertson, 1975; Robertson & Warner, 1978; Kazancıoğlu & Alonzo, 2010) and plasticity in somatic growth (Gust, 2004; Munday *et al.*, 2004). This combination of taxonomic, ecological, and reproductive characteristics has prompted a number of studies on their evolutionary history, with nine phylogenetic analyses emerging over the last decade.

The evidence for a recent and rapid diversification in scarines (Alfaro *et al.*, 2009; Kazancıoğlu *et al.*, 2009), coupled with the analysis of morphological evolution of the pharyngeal and oral jaws (Price *et al.*, 2010), has focused attention on the processes underlying their speciation. Initial studies (Streelman *et al.*, 2002) identified a pattern of diversification that represented a classical example of an adaptive radiation, with a signature of natural and sexual selection (Streelman & Danley, 2003). These studies suggested that partitioning by habitat occurred in the deepest evolutionary nodes, with sparismatine (primarily *Sparisoma* and *Calotomus*) species being associated with seagrass habitats, and scarinines (*Bolbometopon*, *Cetoscarus*, *Hipposcarus*, *Chlorurus*, and *Scarus*) associated with coral reefs. Trophic diversification was visualized in terms of the development of scraping or excavating feeding modes linked to the fusion of dental plates and jaw articulations that provided flexibility (for scraping) and increased power (for excavating) calcareous reef substrata. Streelman & Danley (2003) further proposed that the dominant element in the more recent diversification of lineages within the scarine clade involved socio-sexual behaviour (male territoriality and breeding systems), and associated colour pattern development, with sexual selection the primary process.

Subsequent studies (Alfaro *et al.*, 2009; Kazancıoğlu *et al.*, 2009; Price *et al.*, 2010) analyzed rates of morphological change in the scarine labrids and the extent to which modification of the pharyngeal and oral jaws may be implicated in the diversification of speciose clades of parrotfishes. These studies concluded that that, although changes in the pharyngeal (Alfaro *et al.*, 2009) and especially the oral jaws (Price *et al.*, 2010) of scarinine parrotfishes occurred at a greater rate than observed in other labrid taxa, and, in the latter case, were correlated with lineage diversification, these changes were not the underlying cause of the cladogenesis that characterizes some groups of parrotfishes. Alfaro *et al.* (2009) and Kazancıoğlu *et al.* (2009) concluded that the pattern of increased rates of diversification was better explained by the evolution of extreme dichromatism (and other social and behavioural characters relating to sexual selection) within *Scarus* and *Chlorurus*. This conclusion was consistent with the sequential pattern of diversification proposed by Streelman & Danley (2003).

Previous phylogenetic analyses (approximately 50% of the known species of *Chlorurus* and *Scarus*) focussed on the roles of ecological diversification and sexual selection as factors driving diversification. The role of geographical isolation as a process driving diversification has not been considered in detail. Identification of sister taxa, analysis of geographical

ranges, and estimates of the ages at which divergence occurred are a necessary step in analysis of the patterns associated with speciation in this group. Robertson *et al.* (2006) provided a phylogenetic analysis for the genus *Sparisoma*, retrieving a strong signal of allopatric speciation as the primary agent of diversification in *Sparisoma* and *Nicholsina*. They did not find evidence for sexual selection being a dominant process in the diversification of the group.

The current literature thus poses two contrasting scenarios for the evolutionary diversification of scarine labrids: allopatric speciation (i.e. divergence as a result of the geographical disruption of gene flow) versus adaptive radiation in sympatry. The relative frequency of allopatric versus sympatric distributions of sister species is an important step for understanding speciation in parrotfish genera. Allopatric distribution in sister taxa suggests that speciation has been driven by genetic isolation of geographically distinct populations. The expectation under this scenario would be for relatively minor differences in morphology, ecology, and colour patterns in recently-diverged species pairs. By contrast, sympatric distributions of sister taxa would suggest that natural and/or sexual selection has driven the diversification. In this case, we would predict greater differences in size, morphology, habitat associations, and colour patterns between sister taxa, even in recent divergences. Therefore, we assess patterns of distribution, ecology, and sexual colour dimorphism, as well as evolutionary ages of sister species. This approach would also shed light on the utility of the three-stage model of adaptive radiation proposed by Streebman *et al.* (2002) and Streebman & Danley (2003). We note that, although current sympatric distributions of sister taxa and evidence of ecological and reproductive divergence implies selection on these traits, it does not follow that such species initially diverged in sympatry.

The present study, which represents the first comprehensive species-level analysis of the two most speciose clades of parrotfishes, has two objectives. First, is the development of comprehensive time-calibrated phylogeny sufficient to establish the relationships and spatial distribution of *Scarus* and *Chlorurus* sister-species pairs? If this is the case, it would be possible to determine: (1) whether there is a dominant spatial pattern of allopatry versus sympatry and (2) whether the pattern and magnitude of differences in ecological and reproductive characteristics of sister taxa differs among allopatric versus sympatric sister pairs. Second, given the importance placed on ancestral scarine habitats in previous studies, such a phylogeny would allow the assessment of temporal and spatial patterns of diversification aiming to identify the ancestral habitats of taxa at the base of the tree.

## MATERIAL AND METHODS

### TAXON SAMPLING

The phylogenetic analysis incorporated 61 species (see Supporting information, Table S1) comprising 16 of the 18 described species of *Chlorurus* and 45 of the 52 described species of *Scarus* (Parenti & Randall, 2011). Samples were obtained by selective spearing and netting, markets, and by exchanges of tissue samples through colleagues and institutions. A further four species (*Bolbometopon muricatum*, *Hipposcarus harid*, *Hipposcarus longiceps*, and *Cetoscarus bicolor*) were included as outgroups.

### LABORATORY PROCEDURES

Total DNA was extracted from tissues using standard salt-chloroform and proteinase K digestion extraction procedures (Sambrook & Russell, 2001). Three markers, two mitochondrial (control region, 16SrRNA) and one nuclear, S7 ribosomal protein gene Intron1 (S7I1), a gene essential for growth (Synetos, Dabeva & Warner, 1992), were sequenced to explore the evolutionary relationships among the parrotfishes (see Supporting information, Table S2). Each 20- $\mu$ l polymerase chain reaction (PCR) reaction volume contained 2.5 mM Tris-Cl (pH 8.7), 5 mM KCl(NH<sub>4</sub>)<sub>2</sub>SO<sub>4</sub>, 200  $\mu$ M each dNTP, MgCl<sub>2</sub> ranging from 1.5 mM to 4 mM, 10  $\mu$ M each primer, 1 unit of Taq Polymerase (Qiagen) and 10 ng of template DNA. Amplifications followed the same basic cycling protocol: an initial denaturing step of 2 min at 94 °C, followed by 35 cycles, with the first five cycles at 94 °C for 30 s, 30 s at primer specific annealing temperatures ( $T_a$ ) followed by extensions for 1 min 30 s at 72 °C, with the remaining 30 cycles performed as before but at  $T_a - 2$  °C. PCR products were purified by isopropanol precipitation. Two species, *Scarus arabicus* and *Scarus koputea*, routinely amplified two bands of equal size (S7I1) that could not be separated on the agarose gel; therefore, they were cloned before sequencing S7I1. We employed standard cloning procedures in accordance with the manufacturer's instructions (pGEM®-T Easy Vector Systems; Promega). Purified templates were quantified by ultraviolet-visible absorbance (ND-1000 Spectrophotometer; NanoDrop) and sent to Macrogen Inc. (South Korea) for direct sequencing in both directions.

### DATA COMPILATION

Duplicate sequences were edited using SEQUE NCHER, version 4.5 (Gene Codes Corp.), automatically aligned using CLUSTALX (Thompson *et al.*, 1997) and finally manually corrected using SE-AL, version 2.0 (<http://evolve.zoo.ox.ac.uk>) (Rambaut, 1996). Sequences have been deposited in GenBank under accession numbers JX026453–JX026661.

Three specific sequences were downloaded from GenBank: one for the control region: *C. bicolor* (AY324589, I.-S. Chen, unpubl. data); and two for 16S rRNA: *Scarus coelestinus* (AY081083) and *Scarus guacamaia* (AY081085) (Streelman *et al.*, 2002). Two of the three genes, the mitochondrial 16SrRNA and the nuclear intron (S7I1), were partitioned into putative stem (conserved 16S = 500 bp, S7I1 = 458 bp) and loop (hypervariable 16S = 105 bp, S7I1 = 194 bp) regions. In total, five separate gene partitions were identified and each region was examined for its best fitting model using MRMODELTEST, version 2.2 and Aikake information criterion (AIC) (Nylander, 2004; Nylander *et al.*, 2004). The five separate gene partitions, each with their specific model, were subsequently concatenated for phylogenetic analysis.

#### PHYLOGENETIC ANALYSIS

Maximum parsimony (MP) analyses were implemented in PAUP\* 4.0b10 (Swofford, 1998) using heuristic search methods with 1000 pseudoreplicate bootstraps, tree-bisection-reconnection branch swapping, and random addition of taxa. Two separate heuristic MP runs were performed. First, all sites were treated equally and second, sites were weighted 2 : 1 according to gene partitions; the combined S7I1 (stem and loop, 652 bp) with 16S (stem and loop, 605 bp) sequences were given a weight of 2, and the control region (470 bp) was given a weight of 1. A 50% majority-rule consensus tree was generated from all shortest trees obtained.

Bayesian inference (BI) analyses were implemented in MrBayes, version 3.1.2 (Huelsenbeck & Ronquist, 2001) using CIPRES Portals (Miller *et al.*, 2009) ([http://www.phylo.org/sub\\_sections/portal](http://www.phylo.org/sub_sections/portal)). The analysis of the concatenated data used a partition-mixed model method (pMM) utilizing the identified locus-specific substitution models. Six Bayesian pMM analyses were performed using Markov chain Monte Carlo (MCMC) simulations with four chains of 5 000 000 generations each, sampling trees every 500 generations. Stationarity was reached after 20 000 generations, visualized in TRACER, version 1.5 (Rambaut & Drummond, 2007), and a 50% majority-rule consensus tree was computed using the best 10 000 post burn-in trees from each run. Two outgroups, *C. bicolor* and *B. muricatum*, were used to root resulting trees. The single best tree was selected for molecular dating.

#### MOLECULAR DATING

Fossil records of scarine labrids are limited (Bellwood, 1996; Bellwood, 1997; Bellwood & Wainwright, 2002). The available records include a sparismatinine

parrotfish *Calotomus preisli* (Bellwood & Schultz, 1991) from middle Miocene (approximately 14 Mya) of Austria. The second fossil placed in the late Miocene (approximately 12 Mya) and also reviewed by Bellwood & Schultz (1991) comprised two tooth fragments unique to the genus *Bolbometopon*. This material has been used to age previous parrotfish phylogenies (Streelman *et al.*, 2002; Smith *et al.*, 2008; Alfaro *et al.*, 2009; Kazancıoğlu *et al.*, 2009).

To estimate ages of diversification for the present *Chlorurus-Scarus* study, we first had to re-examine and calibrate age divergences of the parrotfish phylogeny of Streelman *et al.* (2002) (henceforth referred to as Streelman's data or topology). Streelman's sequence data were obtained from GenBank (accession numbers AY081063–AY081133 and AY081211). Additional to Streelman's data, sequences of two pomacentrids [accession numbers TMO-4c4: U70326 and U70355 (Streelman & Karl, 1997); 12S: AF285920 and AF285927 (Tang, 2001); 16S: AF112577 (Farias *et al.*, 1999) and AF119402 (Bernardi & Crane, 1999); cytochrome *b*: AF119399 (Bernardi & Crane, 1999) and AY208553 (Quenouille, Birmingham & Planes, 2004)] and two cichlids [accession numbers TMO-4c4: U70347 and U70357 (Streelman & Karl, 1997); 16S: AF112584 (Farias *et al.*, 1999) and AF112637 (Farias, Orti & Meyer, 2000); cytochrome *b*: AF370631 and AF370632 (Farias *et al.*, 2001)] were included. The latter four species were used to: (1) root the phylogeny and, more importantly, (2) calibrate the base of the best tree because two fossil pomacentrids, *Palaeopomacentrus orphae* (Bellwood & Sorbini, 1996) and *Lorenzichthys olihan* (Bellwood, 1999), were described from the lower middle Eocene at Monte Bolca, Italy. Both fossil pomacentrids have one common feature (synapomorphy) with modern pomacentrids: two-anal fin spines in supernumerary association (Bellwood, 1999). Using Streelman's data with four additional outgroup taxa, we reconstructed a modified Streelman parrotfish topology by BI employing a pMM method as described above. The resulting best-inferred tree of Streelman's data (Newick format available from S. Klanten) was then used to estimate divergence times. It is this modified Streelman parrotfish topology with age estimates (available from S. Klanten) that served as a basis to select a range of ages to date our comprehensive *Chlorurus-Scarus* phylogeny.

Initial calibrations of our *Chlorurus-Scarus* phylogeny were performed in r8s (Sanderson, 2004), selecting five dates (12, 14, 16, 18, and 20 Mya) derived from the modified Streelman's aged topology (see above) and henceforth referred to as legacy ages. In addition, an internal age of 3.5 Mya for the transisthmian *Scarus hoefleri-perrico* sister pair was included. We employed a log PL algorithm (Sander-

son, 2002) with an appropriate smoothing factor to generate separate chronograms. These chronograms were each subsequently used as starting trees for five separate analyses in BEAST, version 1.6 (Drummond & Rambaut, 2007). BEAST estimates ages using a Bayesian MCMC algorithm by sampling trees. The advantage of this algorithm is that it simultaneously estimates branch lengths, all possible topologies, substitution models, and ages based on fossil calibrations. Furthermore, BEAST allows a relaxed clock to estimate rates independently on different branches, either from an uncorrelated exponential distribution or uncorrelated lognormal distribution (UCLD). Five separate legacy calibrations (12, 14, 16, 18, and 20 Mya) were performed each using  $5 \times 10^6$  MCMC generations with the Yule speciation process (pure birth model) and an UCLD rate model. The following priors were employed after rigorous testing: legacy ages (tmrca) with normal distribution and 1.25 SD, a set internal age of 3.5 Mya with an SD of 0.5; lognormal priors for ucl.d.mean, meanRate, covariance, and exponential priors for yule.birthRate and ucl.d.stdev. All resulting files were inspected in TRACER, version 1.5 (Rambaut & Drummond, 2007) to determine that all runs converged and obtained effective sample size values  $> 200$ . Resulting tree files were summarized in TREEANNOTATOR with a specified tree and visualized in FIGTREE, version 1.3.1 (Rambaut, 2009) (<http://tree.bio.ed.ac.uk/software/figtree/>) to illustrate the 95% highest posterior density intervals (HPDs) on selected nodes.

#### DISTRIBUTIONAL ANALYSIS

Individual species distribution maps were generated through the IUCN Red Listing process (see Supporting information, Table S3). Range size estimates for individual species were obtained through measurement of the area ( $\text{km}^2$ ) occupied by each species as shown on the distribution maps using IMAGE TOOL (see Supporting information, Table S3). Two recent analyses of the biogeography of reef-associated biota (Spalding *et al.*, 2007; Briggs & Bowen, 2012) were used to classify distribution patterns. The partitioning of tropical marine environments (warm oceans) into the Indo-West Pacific, East Pacific, Western Atlantic, and Eastern Atlantic (Briggs & Bowen, 2012) accommodated the major biogeographical patterns in the present study. *Sensu* Spalding *et al.* (2007), the Indo-West Pacific region was partitioned as the Western Indo-Pacific (Red Sea and Gulf of Aden to western Sumatra), Central Indo-Pacific (Gulf of Tonkin to Fiji), and the Eastern Indo-Pacific (Hawaii to Marquesas). The Tropical East Pacific extends from the Gulf of California in the north and to northern Peru in the south (Robertson & Cramer,

2009). The Tropical Atlantic was partitioned as the north-west Atlantic (primarily the Caribbean) and the south-west Atlantic (Brazil), and West Africa and the Gulf of Guinea (Spalding *et al.*, 2007). The archipelagos at the junction of the Indian and Pacific oceans were identified as the Coral Triangle Region (Veron, 1995; Allen, 2008).

General habitat categories were based on association of reefs with three types of landmasses: continental coasts, high islands, and oceanic islands. The classification is based on distance from continental shores and island size because exposure to terrestrial influences such as run-off may have profound influences on the scarine fauna (Russ, 1984a, b; Mellin *et al.*, 2010). High islands were considered to have a minimum area of  $150 \text{ km}^2$  with vegetation cover and the potential for run-off and sedimentation (Arnberger & Arnberger, 2001). Oceanic islands had land areas  $< 150 \text{ km}^2$  with a distance  $> 200 \text{ km}$  from the nearest landmass. For these islands, the dominant influences were exposure to open ocean conditions and reduced impact of terrestrial run-off and sedimentation. The habitat structure of the central Indo-Pacific has been strongly influenced by geologically-recent variations in sea level, including the inundation of the Sunda shelf, resulting in the creation of vast new habitat areas (Coller, 2009; Crandall *et al.*, 2012). This represents a recent and novel habitat for parrotfishes, although occupancy appears to be restricted to only a few species. Accordingly, percentage occupancy of the Sunda Shelf habitat was estimated for Indo-Pacific species (see Supporting information, Table S3).

Analysis of distributional allopatry and sympatry was restricted to reciprocally-monophyletic sister species as identified from the phylogeny of 61 species. The method used to estimate the degree of distributional sympatry among sister species followed that previously used by Barraclough & Vogler (2000) and Quenouille *et al.* (2011). The degree of sympatry in sister species was defined as the percentage of overlap between the range of the more restricted species with its more widespread sister. Spatial sympatry in scarine sister species varied to a greater degree than that recorded in the above studies. For example, Quenouille *et al.* (2011) recorded sympatry indices as being consistently  $> 0.95$  in various reef fish taxa. However, the present study identified the lower bound of sympatric overlap as 0.41, whereas allopatric taxa had a spatial overlap of  $< 10\%$  (0–9.1). Chesser & Zink (1994) also recorded greater variation in the degree of spatial overlap than Quenouille *et al.* (2011) when identifying a speciation mode. For example, in five taxa in which allopatric speciation was identified, they found that distributional overlap varied from 0.07 to 0.197. For the purposes of the

present study, we defined allopatry as < 10% overlap, and sympatry as > 10% overlap, which is consistent with the classification of Quenouille *et al.* (2011).

#### MORPHOLOGICAL ANALYSIS

Species of *Chlorurus* and *Scarus* exhibit important functional differences in the structure of oral and pharyngeal jaws (Bellwood & Choat, 1990; Wainwright *et al.*, 2004; Price *et al.*, 2010). These differences are reflected in external morphology, especially the dimensions of the dental plates and the relative proportions of the head. Head and jaw dimensions are associated with different feeding and foraging modes Bellwood & Choat (1990). Six morphological variables based on the analyses of Bellwood, (1994) and Bellwood & Choat, (1990) were obtained from digital image measurements of five individuals of each of the 61 species, using IMAGE TOOL (<http://compdent.uthscsa.edu/dig/itdesc.html>). In addition, we estimated body size and dimensions that have been shown to influence swimming speed and foraging modes in reef fishes (Fulton & Bellwood, 2005).

The majority of images were obtained from specimens, although, for a number of larger, rarer species, underwater images of living individuals were used. Measurement biases associated with parallax precluded a landmark-based analysis of this data set. The variables measured were fork length, body depth, head length, maximum cheek depth, snout profile, and dental plate exposure. These measurements were used to estimate the means for each species. Because length measurements could not be obtained from images of living individuals, fork length is the mean of the three to seven largest specimens where fork length could be accessed. Three meristic variables of major importance in separating scarine species, median predorsal scales, number of cheek scales, and pectoral rays, were also counted. The resulting data matrix was analyzed using hierarchical cluster analysis of euclidian distance and average linkage in PRIMER (<http://www.primera.com/>). Descriptions of colour pat-

terns were obtained from digital images of living and newly-collected specimens taken in the field.

#### RESULTS

##### PHYLOGENETIC INFERENCE

We examined 1727 bp of sequences, of which approximately 40% was parsimony-informative. The two mitochondrial markers, 16S rRNA and control region, had 605 and 470 bp, respectively, and the nuclear S7I1 contributed a further 652 bp with (14%, 63%, and 57% parsimony-informative sites, respectively). Five gene-specific models (based on AIC) were used for Bayesian partition analysis: 16S stem required a SYM + I + G model, 16S loop required a GTR + G model, the control region (CR) required a HKY + G model, and finally the S7I1 stem and loop both required a HKY + G model. The model selection for Bayesian pMM analysis only requires a general 'form' of the model (Nylander *et al.*, 2004) because the Markov chain integrates uncertainties of the parameter values. Therefore, four of the five gene partitions (16S loop, CR, S7I1 stem and loop) had an unequal base frequency, whereas the 16S stem partition's base frequency was set to fixed = equal. Stationarity of the Bayesian analyses was reached after 20 000 generations in all six runs, visualized in TRACER, version b1.5 (Rambaut & Drummond, 2007) and the 50% majority rule consensus tree topology was no different from the best trees of each run (best tree lnL = -21 652.052) with very high posterior probabilities (Fig. 1A). Both MP and Bayesian analyses produced the same tree topology. We therefore included only the support for each retrieved node (Fig. 1A).

In all trees, *Hipposcarus* was sister to *Chlorurus* and *Scarus*. The Bayesian analysis was consistent with previous studies with respect to confirming the monophyly of *Chlorurus* and *Scarus* with strong support (Fig. 1A). Analysis of the 45 species sampled from the genus *Scarus* identified ten clades, with the most basal, SC10, (Fig. 1A) consisting of a complex

**Figure 1.** Inferred phylogeny of parrotfish genera *Chlorurus*, *Scarus*, and *Hipposcarus* (scarine labrids) based on a comprehensive taxon sampling (63 out of 72 extant species) and two known outgroup species, *Bolbometapon muricatum* and *Cetoscarus bicolor*, obtained by Bayesian and maximum parsimony (MP) analyses for three loci (16S, control region, S7I1). A, topology of the best Bayesian tree (consensus of 10 000 trees) with posterior probabilities (%) and bootstrap-support (> 50%) of MP (1000 bootstrap replicates) are indicated, asterisks (\*), representing 100% posterior probability/ bootstrap support respectively. Numbers following species complexes of *Scarus ghobban*, and *Scarus rubroviolaceus* represent the regions: 1 Eastern Pacific (EP), 2 Great Barrier Reef (GBR), 3 Seychelles (SY), 4 Oman (OM). Clade names (CH, SC) are indicated representing five *Chlorurus* and ten *Scarus* clades. B, chronogram based on BEAST Markov chain Monte Carlo runs with 95% highest posterior density interval (HPD) in million years (Myr). Black circles indicate nodes that were constrained, tmrca (SD) at 16 Myr, tmrca (HS) at 13 Myr and the trans-isthmian sister pair tmrca(hoefleri/perrico) at 3.5 Myr. Nodes are numbered (for mean age and HPD range estimates, see Table 1): C1–C10 for *Chlorurus* and S1–S33 for *Scarus*.

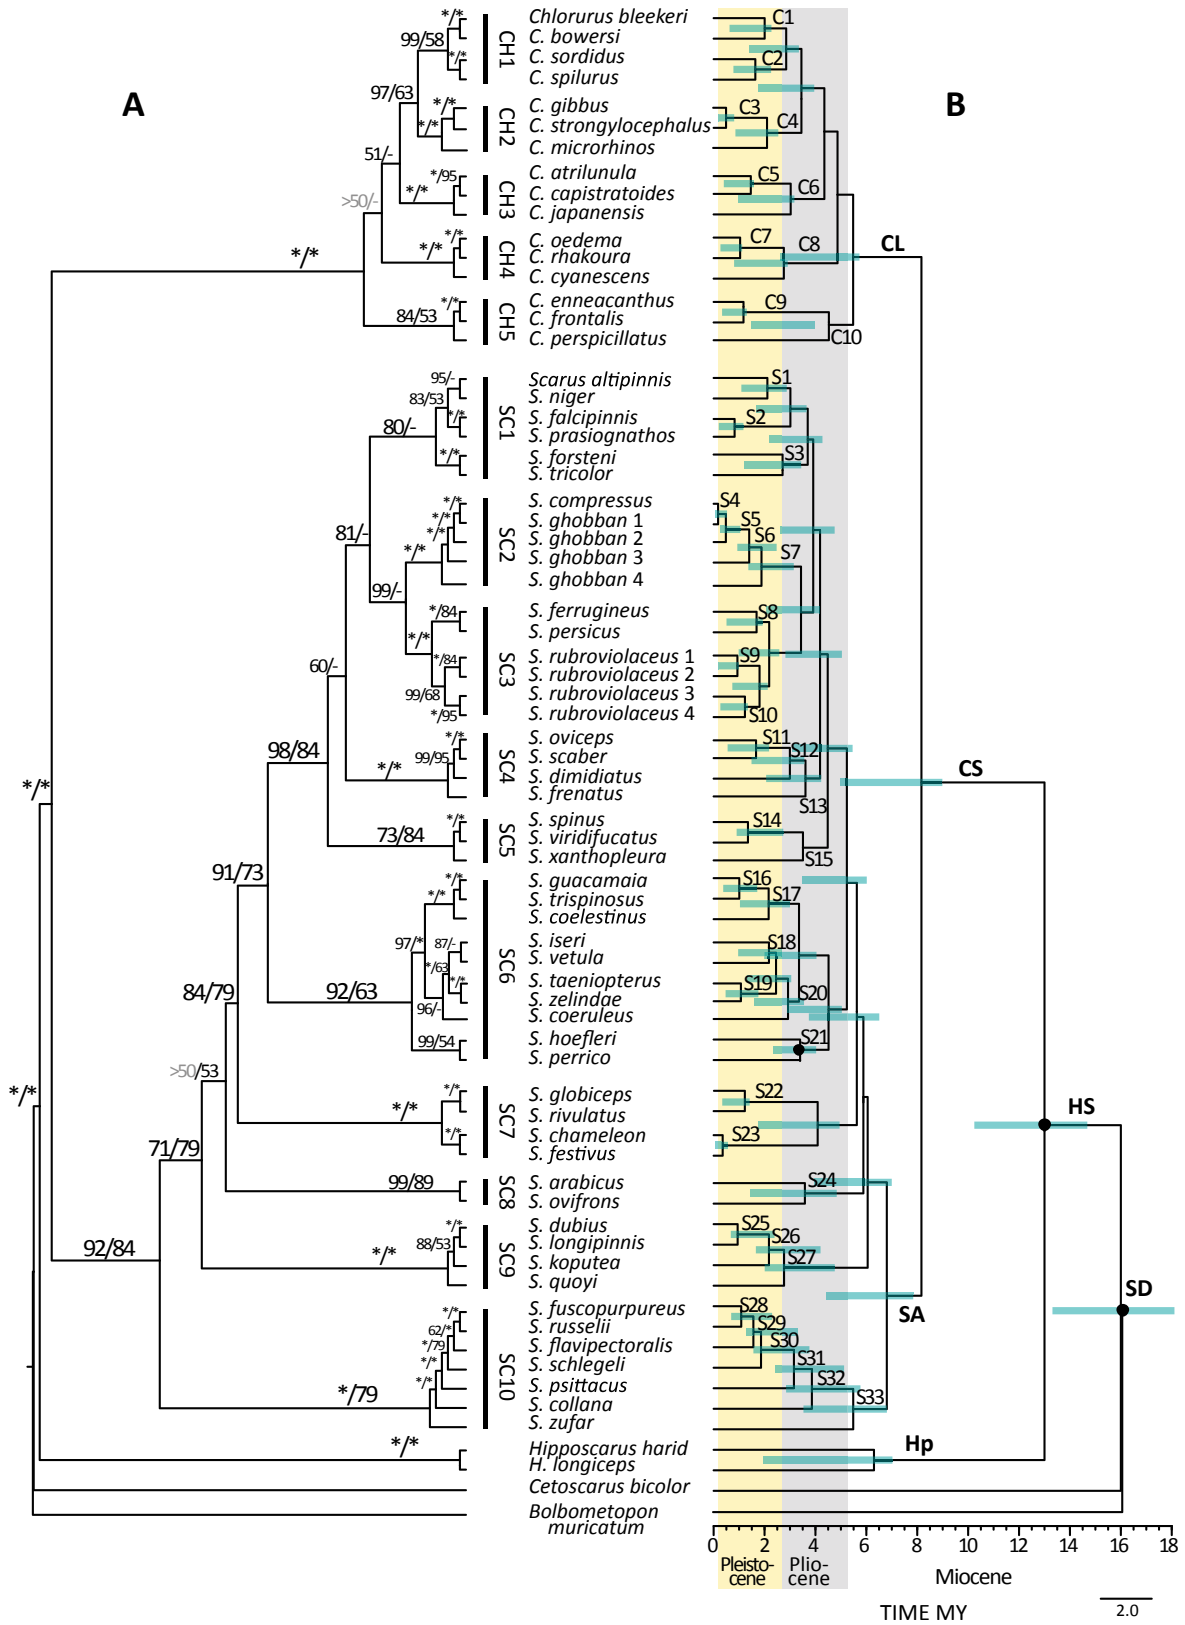

Downloaded from https://academic.oup.com/iob/advance-article/doi/10.1093/iob/obz016/5291270/1639 by guest on 24 April 2024

grouping of widely distributed and endemic species. Clade SC6 was of interest because it contained all the tropical Atlantic representatives of the genus plus a single distinctive East Pacific species, *S. perrico*. This clade was distinct from SC2, which contained the widespread taxon *Scarus ghobban* and its east Pacific sister species *Scarus compressus*. Clade SC2 was sister to another widespread species, *Scarus rubroviolaceus*, SC3. Ongoing work on this taxon suggests that it is a species complex (Fitzpatrick *et al.*, 2011). The most derived clade SC1 consisted of species strongly associated with well-developed crest and front reef habitats. Within the genus *Chlorurus*, the analysis retrieved five clades consisting largely of species with either Pacific or Indian Ocean distributions. In total, we retrieved 22 strongly supported pairs of sister species, with six pairs in *Chlorurus* and the remaining 16 pairs in *Scarus*.

The chronogram (BEAST MCMC analysis; Fig. 1B) used a similar dating procedure to that employed in previous studies (Smith *et al.*, 2008; Alfaro *et al.*, 2009) but employed different markers. Moreover, Alfaro *et al.* (2009) used additional fossils and direct dating. All studies reported similar conclusions that parrotfishes are a relatively young group. Our results show that the genera *Hipposcarus*, *Scarus*, and *Chlorurus* are of late Miocene (Messinian) age, and that the ages of the 15 clades of *Scarus* and *Chlorurus* range from very late Messinian (5.48 Mya) to mid/late Pleistocene (0.17 Mya) (Table 1).

Short branch lengths and relatively poor resolution of some internal nodes suggested a period of rapid diversification of these genera in the late Miocene/early Pliocene. Age estimates for *Scarus* and *Chlorurus* are provided in Table 1. For *Scarus*, the mean age of 6.8 Mya (95% HPD 4.4–7.8) was older than that of *Chlorurus*, 5.5 Mya (95% HPD 2.6–5.7), suggesting a more recent diversification of the latter genus. The tropical Atlantic clade SC6 had an estimated mean age of 4.52 Mya, which is older than the divergence of the east Pacific populations of *S. ghobban* (mean age, 0.17 Mya) and *S. rubroviolaceus* (mean age, 0.93 Mya). *Scarus perrico* (East Pacific endemic) was sister to the endemic eastern Atlantic *S. hoefleri*, with a mean divergence age of 3.4 Mya. The oldest divergence estimates were found in species at the base of the tree that were also endemics with peripheral distributions. These included *Scarus zufar* (mean age, 5.5 Mya), *S. arabicus* (mean age, 3.6 Mya) from the Omani coast and Gulf of Aden, *S. hoefleri* and *S. perrico* (mean age, 3.4 Mya) from the eastern Atlantic and eastern Pacific, respectively, and *Chlorurus perspicillatus* (mean age, 4.5 Mya), endemic to the Hawaiian Islands. Species endemic to the Red Sea *Chlorurus gibbus* and *Scarus collana* showed different mean divergence estimates of 0.49 and 3.86 Mya,

respectively, suggesting a pattern of repeated speciation in this area.

The phylogenetic analysis presented here retrieved a topology and chronology consistent with that of three previous studies (Smith *et al.*, 2008; Alfaro *et al.*, 2009; Kazancıoğlu *et al.*, 2009). Although the mean ages estimated in the present study for *Scarus* and *Chlorurus* were slightly older than in these previous studies (6.8 versus 6 and 5.48 versus 4 Mya), they lay within the 95% HPD interval of Alfaro *et al.* (2009).

#### DISTRIBUTION PATTERNS

The 61 species analyzed were distributed across the Indo-West Pacific, East Pacific, and Atlantic Ocean regions (Fig. 2A, B, C, D, E, F, G, H, I, J, K, L, M, N, see also Supporting information, Table S3). Fifty-two of the 61 species (36 *Scarus* and 16 *Chlorurus*) were from the Indo-West Pacific and Tropical East Pacific regions. The Pacific Ocean (East to West Pacific) supported 34 species, the Indian Ocean (including the Red Sea) supported 26 species, and the Atlantic supported nine species. Most distributions were concentrated in the central region of the Indo-Pacific or in the Caribbean reef system of the tropical western Atlantic. Peripheral regions, including the northwest Indian Ocean and the Red Sea, Hawaii, the Marquesas and the tropical East Pacific in the broader Indo-Pacific, and East Africa, and Brazil in the Atlantic, were depauperate. The genus *Chlorurus* was absent from both the East Pacific and the Atlantic. Most species occurred within regions bounded by 33° latitude North and South, with only nine species (seven *Scarus* and two *Chlorurus*) colonizing regions beyond this.

Species varied considerably in range size ( $0.0975\text{--}18.968 \times 10^6 \text{ km}^2$ ), with a strong positive skew for each genus (Fig. 3; see also Supporting information, Table S3). The mean range size for all species was  $4.945 \pm 0.64 \times 10^6 \text{ km}^2$ , with *Scarus* at  $5.28 \pm 0.77 \times 10^6 \text{ km}^2$  and *Chlorurus* at  $4.01 \pm 1.09 \times 10^6 \text{ km}^2$ . Species in the tropical Atlantic had smaller range sizes ( $1.98 \pm 0.33 \times 10^6 \text{ km}^2$ ). The majority (57%) of species had relatively small range sizes, of  $< 3.0 \times 10^6 \text{ km}^2$ . Two species, *S. rubroviolaceus* and *S. ghobban*, had ranges that spanned the tropical Indo-West Pacific and Eastern Pacific regions (26 000–28 000 km of longitude), with three others, *Scarus niger*, *Scarus frenatus*, and *Scarus psittacus*, exhibiting longitudinal ranges  $> 15\ 000 \text{ km}$  (Fig. 2). Ten species were endemic to small ( $< 15\%$  of the mean range size) areas of the Western, Central, and Eastern Indo-Pacific, and the Tropical East Pacific (*sensu* Spalding *et al.*, 2007). Five of these (*C. gibbus*, *S. arabicus*, *S. collana*, *Scarus persicus*, *S. zufar*) were restricted to the north-west Indian ocean (Red Sea, Gulf of Aden, and Oman), two (*S. compressus*,



**Table 1.** Age estimates for *Chlorurus* and *Scarus* species, sister-species pairs, and 15 identified clades

| Node  | Description                                                  | Mean age (Myr) | 95% HPD (Myr)     |
|-------|--------------------------------------------------------------|----------------|-------------------|
| SD    | <i>Bolbometopon</i> – <i>Cetoscarus</i>                      | 16.0           | 13.30–18.1        |
| HS    | <i>Hipposcarus</i> + <i>Scarus</i> + <i>Chlorurus</i>        | 13.0           | 10.24–14.68       |
| CS    | <i>Scarus</i> + <i>Chlorurus</i>                             | 8.16           | 4.99–8.99         |
| SA    | <i>Scarus</i>                                                | 6.8            | 4.43–7.84         |
| Hp    | <i>Hipposcarus</i>                                           | 6.3            | 1.94–7.03         |
| CL    | <i>Chlorurus</i>                                             | 5.48           | 2.58–5.68         |
|       | <b><i>Chlorurus</i> sister species / clades</b>              |                |                   |
| C1    | <i>Chlorurus bleekeri</i> – <i>bowersi</i>                   | 2.0            | 0.62–2.27         |
| C2    | <i>Chlorurus sordidus</i> – <i>spilurus</i>                  | 1.64           | 0.78–2.26         |
| Clade | CH1                                                          | 2.85           | 1.40–3.35         |
| C3    | <i>Chlorurus gibbus</i> – <i>strongylocephalus</i>           | 0.49           | 0.17–0.81         |
| C4    | <i>Chlorurus microrhinos</i> (clade CH2)                     | 2.1            | 0.86–2.54         |
| C5    | <i>Chlorurus atrilunula</i> – <i>capistratoides</i>          | 1.46           | 0.23–1.42         |
| C6    | <i>Chlorurus japonensis</i> (clade CH3)                      | 3.03           | 0.82–3.03         |
| C7    | <i>Chlorurus oedema</i> – <i>rhakoura</i>                    | 1.04           | 0.15–1.0          |
| C8    | <i>Chlorurus cyanescens</i> (clade CH4)                      | 2.76           | 0.75–2.86         |
| C9    | <i>Chlorurus enneacanthus</i> – <i>frontalis</i>             | 1.17           | 0.18–1.16         |
| C10   | <i>Chlorurus perspicillatus</i> (clade CH5)                  | 4.53           | 1.33–3.81         |
|       | <b><i>Scarus</i> sister species / clades</b>                 |                |                   |
| S1    | <i>Scarus altipinnis</i> – <i>niger</i>                      | 2.11           | 1.09–2.87         |
| S2    | <i>Scarus falcipinnis</i> – <i>prasiognathos</i>             | 0.82           | 0.20–1.17         |
| S3    | <i>Scarus forsteni</i> – <i>tricolor</i>                     | 2.71           | 1.18–3.44         |
| Clade | SC1                                                          | 3.7            | 2.18–4.28         |
| S4    | <i>Scarus compressus</i> – <i>ghobban</i> (1)                | 0.17           | 0.07–0.53         |
| S5    | <i>Scarus ghobban</i> (2)                                    | 0.48           | 0.27–1.05         |
| S6    | <i>Scarus ghobban</i> (3)                                    | 1.4            | 0.93–2.48         |
| S7    | <i>Scarus ghobban</i> (4) (clade SC2)                        | 1.88           | 1.36–3.15         |
| S8    | <i>Scarus ferrugineus</i> – <i>persicus</i>                  | 1.69           | 0.51–1.93         |
| S9    | <i>Scarus rubroviolaceus</i> (1) – <i>rubroviolaceus</i> (2) | 0.93           | 0.17–0.99         |
| S10   | <i>Scarus rubroviolaceus</i> (3) – <i>rubroviolaceus</i> (4) | 1.23           | 0.26–1.34         |
| Clade | SC3                                                          | 2.18           | 0.98–2.58         |
| S11   | <i>Scarus oviceps</i> – <i>scaber</i>                        | 1.67           | 0.55–2.18         |
| S12   | <i>Scarus dimidiatus</i>                                     | 3.0            | 1.49–3.56         |
| S13   | <i>Scarus frenatus</i> (clade SC4)                           | 3.61           | 2.06–4.23         |
| S14   | <i>Scarus spinus</i> – <i>viridifucatus</i>                  | 1.35           | 0.90–2.74         |
| S15   | <i>Scarus xanthopleura</i> * (clade SC5)                     | 3.51           | N A <sup>-1</sup> |
| S16   | <i>Scarus guacamaia</i> – <i>trispinosus</i>                 | 1.01           | 0.38–1.72         |
| S17   | <i>Scarus coelestinus</i>                                    | 2.16           | 1.03–3.0          |
| S18   | <i>Scarus iseri</i> – <i>vetula</i>                          | 2.17           | 0.96–2.69         |
| S19   | <i>Scarus taeniopterus</i> – <i>zelindae</i>                 | 1.07           | 0.47–1.76         |
| S20   | <i>Scarus coeruleus</i>                                      | 2.92           | 1.62–3.55         |
| S21   | <i>Scarus hoeferi</i> – <i>perrico</i> (trans-isthmian pair) | 3.4            | 2.33–4.03         |
| Clade | SC6                                                          | 4.52           | 2.89–5.04         |
| S22   | <i>Scarus globiceps</i> – <i>rivulatus</i>                   | 1.23           | 0.34–1.42         |
| S23   | <i>Scarus chameleon</i> – <i>festivus</i>                    | 0.35           | 0.06–0.56         |
| Clade | SC7                                                          | 4.09           | 1.76–4.95         |
| S24   | <i>Scarus arabicus</i> – <i>ovifrons</i> (clade SC8)         | 3.59           | 1.45–4.84         |
| S25   | <i>Scarus dubius</i> – <i>longipinnis</i>                    | 0.94           | 0.67–2.39         |
| S26   | <i>Scarus koputea</i>                                        | 2.17           | 1.66–4.2          |
| S27   | <i>Scarus quoyi</i> (clade SC9)                              | 2.77           | 2.01–4.76         |
| S28   | <i>Scarus fuscopurpureus</i> – <i>russelii</i>               | 1.08           | 0.69–2.3          |
| S29   | <i>Scarus flavipectoralis</i>                                | 1.56           | 1.26–3.29         |
| S30   | <i>Scarus schlegeli</i>                                      | 1.86           | 1.56–3.76         |
| S31   | <i>Scarus psittacus</i>                                      | 3.15           | 2.44–5.13         |
| S32   | <i>Scarus collana</i>                                        | 3.86           | 2.85–5.77         |
| S33   | <i>Scarus zufar</i> (clade SC10)                             | 5.48           | 3.53–6.81         |

Mean age estimates are shown in million years (Myr) with 95% highest posterior density interval (HPD) from BEAST Markov chain Monte Carlo analysis.

The tmrca (SD) prior of the root base was set to 16 Mya with SD of 1.25, tmrca (HS) set to 13 MY with SD 1.25 and a known vicariance barrier of the trans-isthmian sister taxa tmrca (*S. hoeferi/perrico*) at 3.5 Myr with SD 0.5. 1, eastern Pacific (EP); 2, Great Barrier Reef (GBR); 3, Seychelles (SY); 4, Oman (OM). \*Sister species to *S. xanthopleura*, *Scarus caudofasciatus* (IO) not sampled.

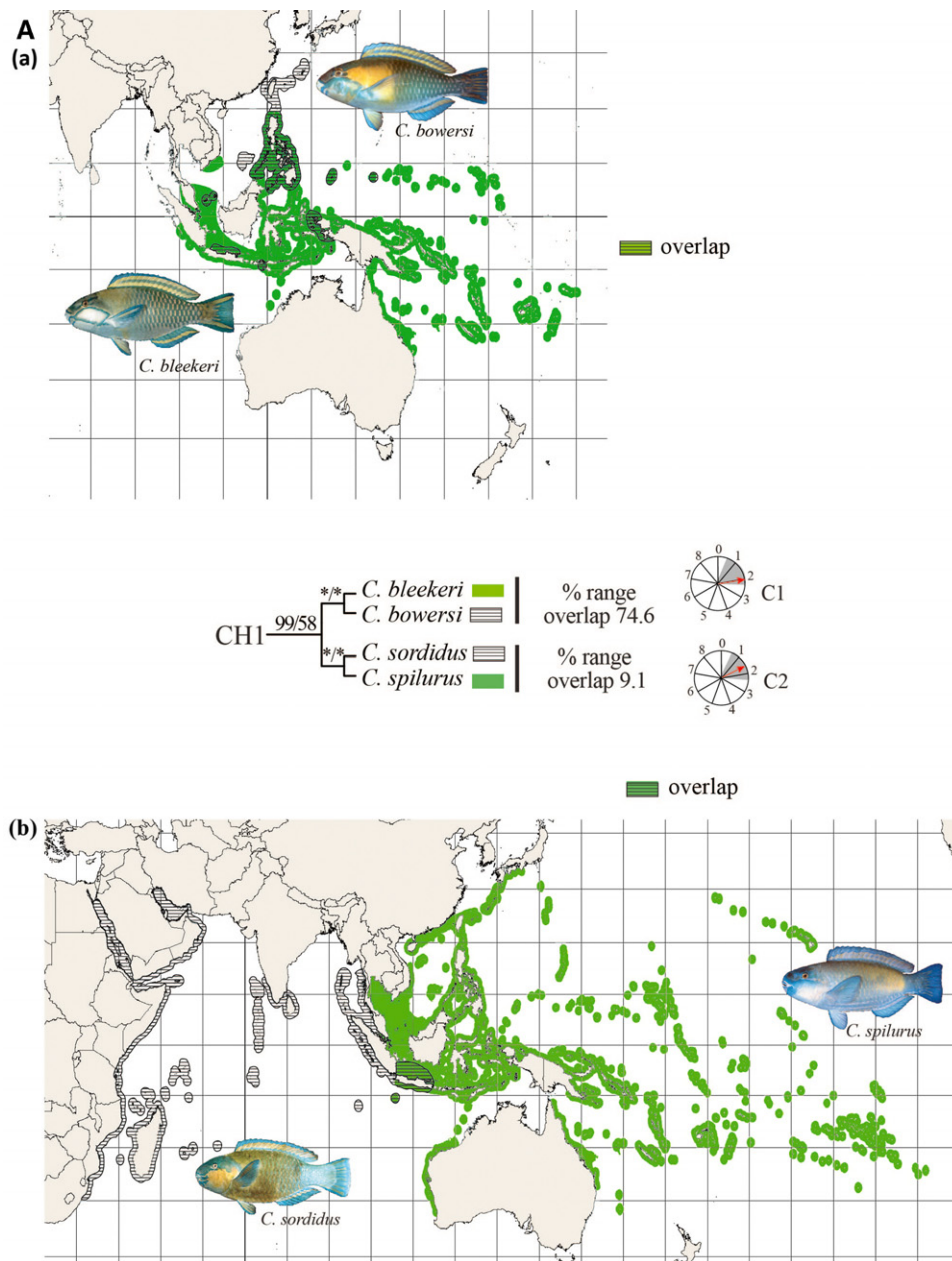

**Figure 2.** Figure 2 A–N. Distributions, range overlap, and ages of divergence in five clades (Ch1–CH5) of *Chlorurus* (Fig 2A–E) and ten clades (SC1–SC10) of *Scarus* (Fig 2F–N). Clade structure and support from Fig. 1. Time dials indicate mean age (red arrow) with 95% highest posterior density interval (HPD) (grey area) for each clade.

*S. perrico*) to the Tropical East Pacific. Six of these species (*S. arabicus*, *S. persicus*, *S. zufar*, *S. koputea*, *S. compressus*, *S. perrico*) occurred in marginal coral reef habitats. These ten species showed limited variation in range size ( $0.097\text{--}0.760 \times 10^6 \text{ km}^2$ ) but a wider range of mean age of diversification (0.17–5.48 mya). This reflects the fact that the peripheral endemics comprised two groups, basal lineages containing *S. zufar*, *S. arabicus*, *S. collana*, *S. perrico*, and *C. perspicillatus* and those belonging to more

recently diverged clades, (*S. compressus*, *Scarus dubius*, *S. persicus*, *S. koputea*, and *C. gibbus*) (Table 1).

The tropical Atlantic fauna consisted of a central Caribbean group (*S. guacamaia*, *Scarus coelestinis*, *Scarus coeruleus*, *Scarus vetula*, *Scarus taeniopterus*, *Scarus iseri*), two species (*Scarus trispinosus* and *Scarus zelindae*) in Brazil, and a solitary species (*S. hoefleri*) endemic to West Africa. *Scarus trispinosus* and *S. zelindae* are of recent origin, whereas *S. hoefleri* was basal in the tropical Atlantic clade.

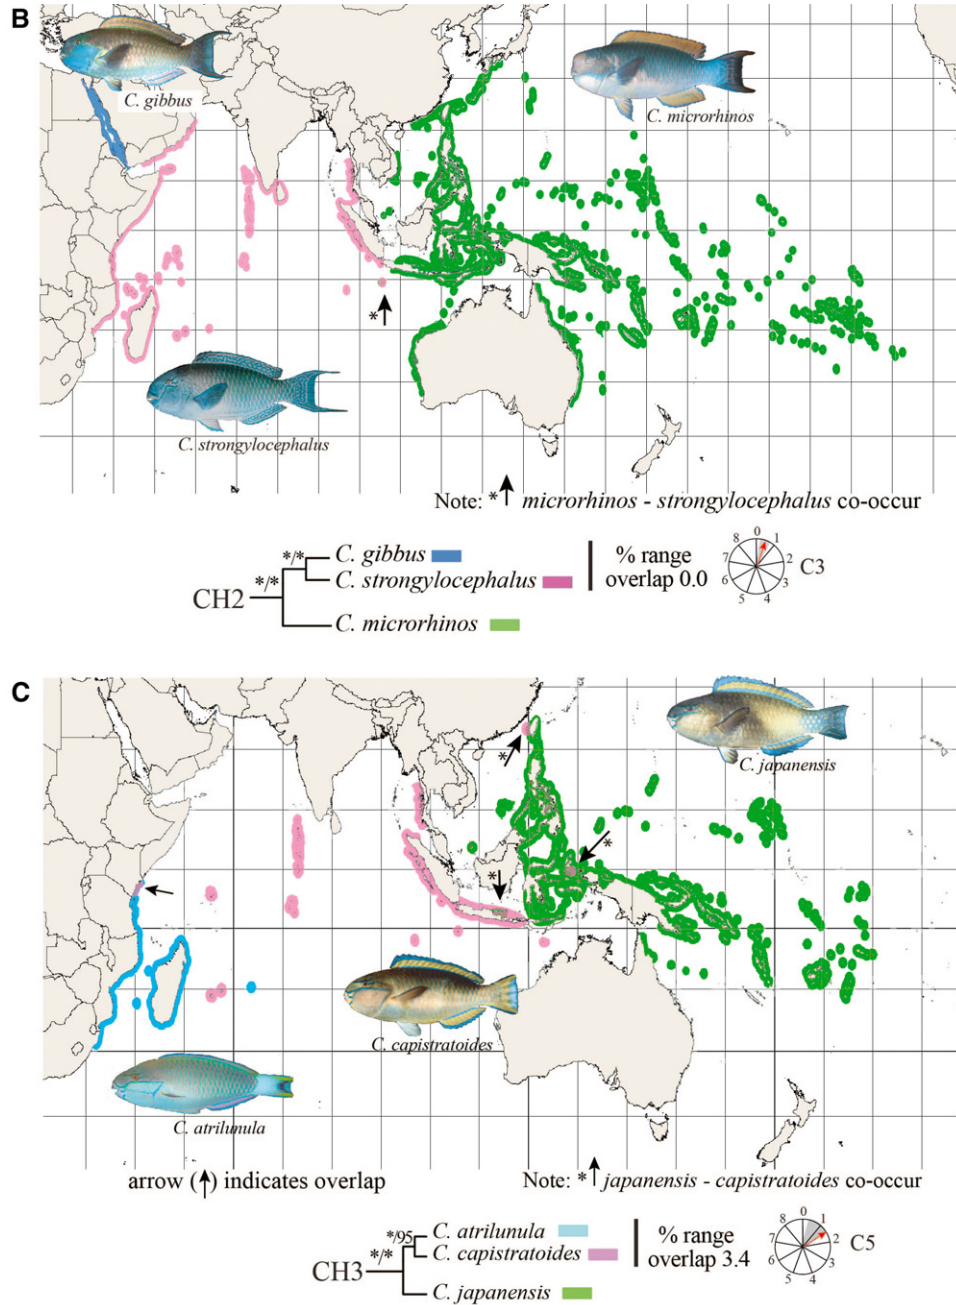

**Figure 2.** Continued

Mapping species distributions revealed variable patterns of spatial overlap among the different clades within each genus. For *Chlorurus*, five of six sister-species pairs had allopatric distributions (Fig. 2B, C, D, E), with only one pair (*Chlorurus bowersi* and *Chlorurus bleekeri*) (Fig. 2A) showing significant (75%) overlap. Distribution patterns in Indo-Pacific species of *Scarus* were more complex, with some clades (Fig. 2M, SC8, 9) dominated by allopatry, others (Fig. 2L, SC7) by sympatry, and others

(Fig. 2F, I, SC1, 4) displaying mixtures of sympatric and allopatric distributions. Tropical Atlantic species formed a single clade in which six of the eight western Atlantic species had sympatric distributions within the north-west Atlantic area (Fig. 2K). The most notable feature of clade SC6 was the distribution of the allopatric species pair *S. hoefleri*, east Atlantic, and *S. perrico*, east Pacific. Among the six pairs of allopatric sister species of *Scarus* in the Indo-Pacific, boundaries were located at the junction of the Pacific

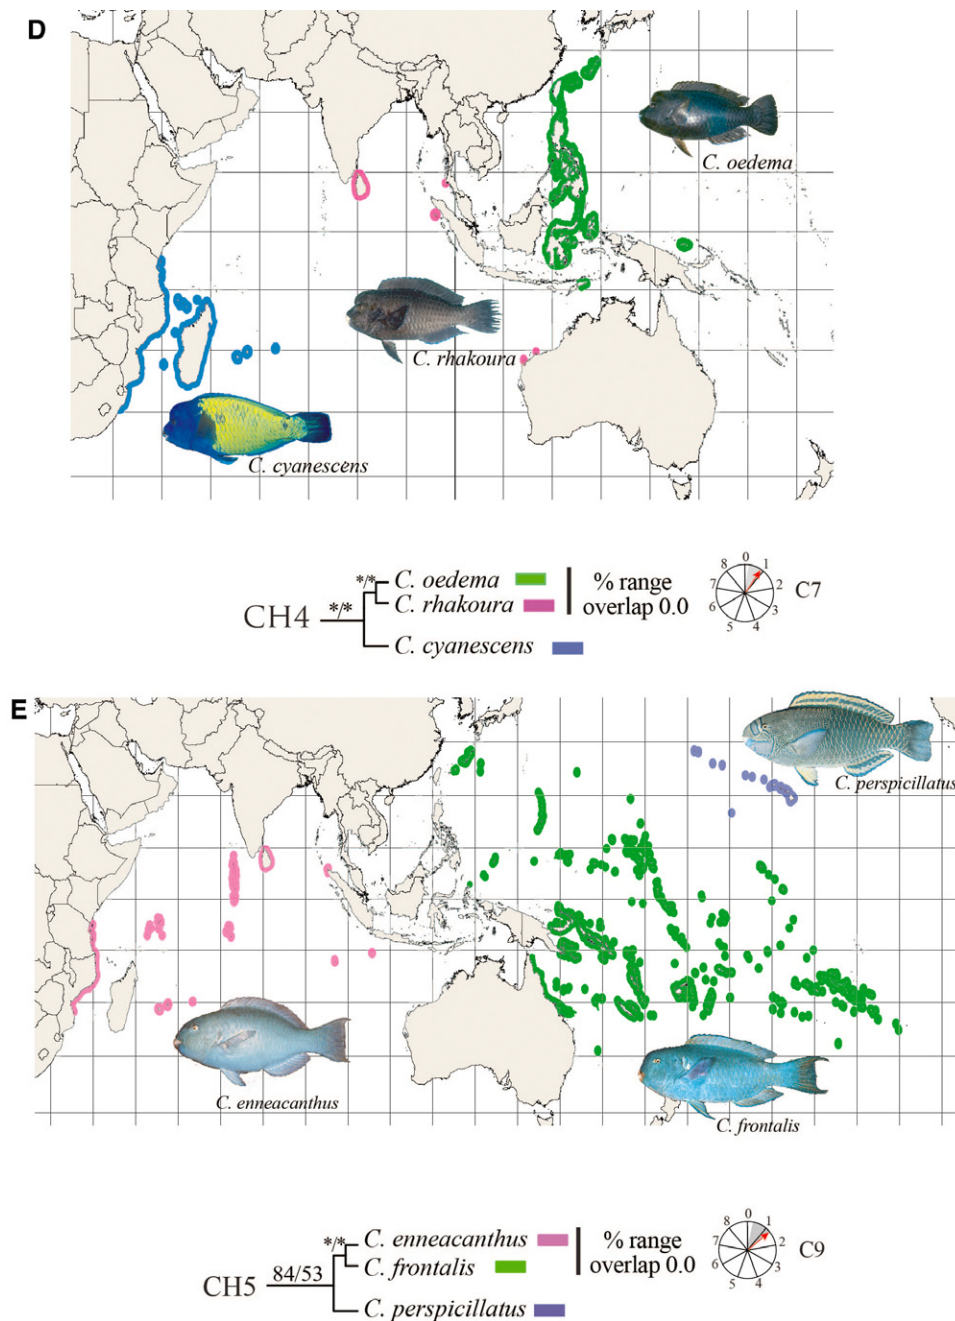

**Figure 2.** *Continued*

and Indian Oceans ( $N=4$ ) and between the south-west and north-west Indian Ocean ( $N=1$ ) and between Hawaii and the Central Pacific ( $N=1$ ) (Fig. 2). The primary area of overlap between sympatric Indo-Pacific species of both genera was the Coral Triangle at the junction of the Indian and Pacific oceans (four of six cases; Fig. 2) but with examples also in the Eastern Indo-Pacific ( $N=1$ ), Western Indo-Pacific ( $N=1$ ), and the Tropical East Pacific ( $N=1$ ). No locally endemic species of *Chloru-*

*rus* or *Scarus* were in the coral triangle area. The main separations in allopatric clades of *Chlorurus* occurred between the Pacific/East Indian Ocean and the central and western Indian Oceans.

#### COMPARISONS AMONG SISTER-SPECIES GROUPS

Nodal age estimates for reciprocally monophyletic sister-species pairs (Table 1) indicate the time taken to achieve the distributions shown in Figure 2.

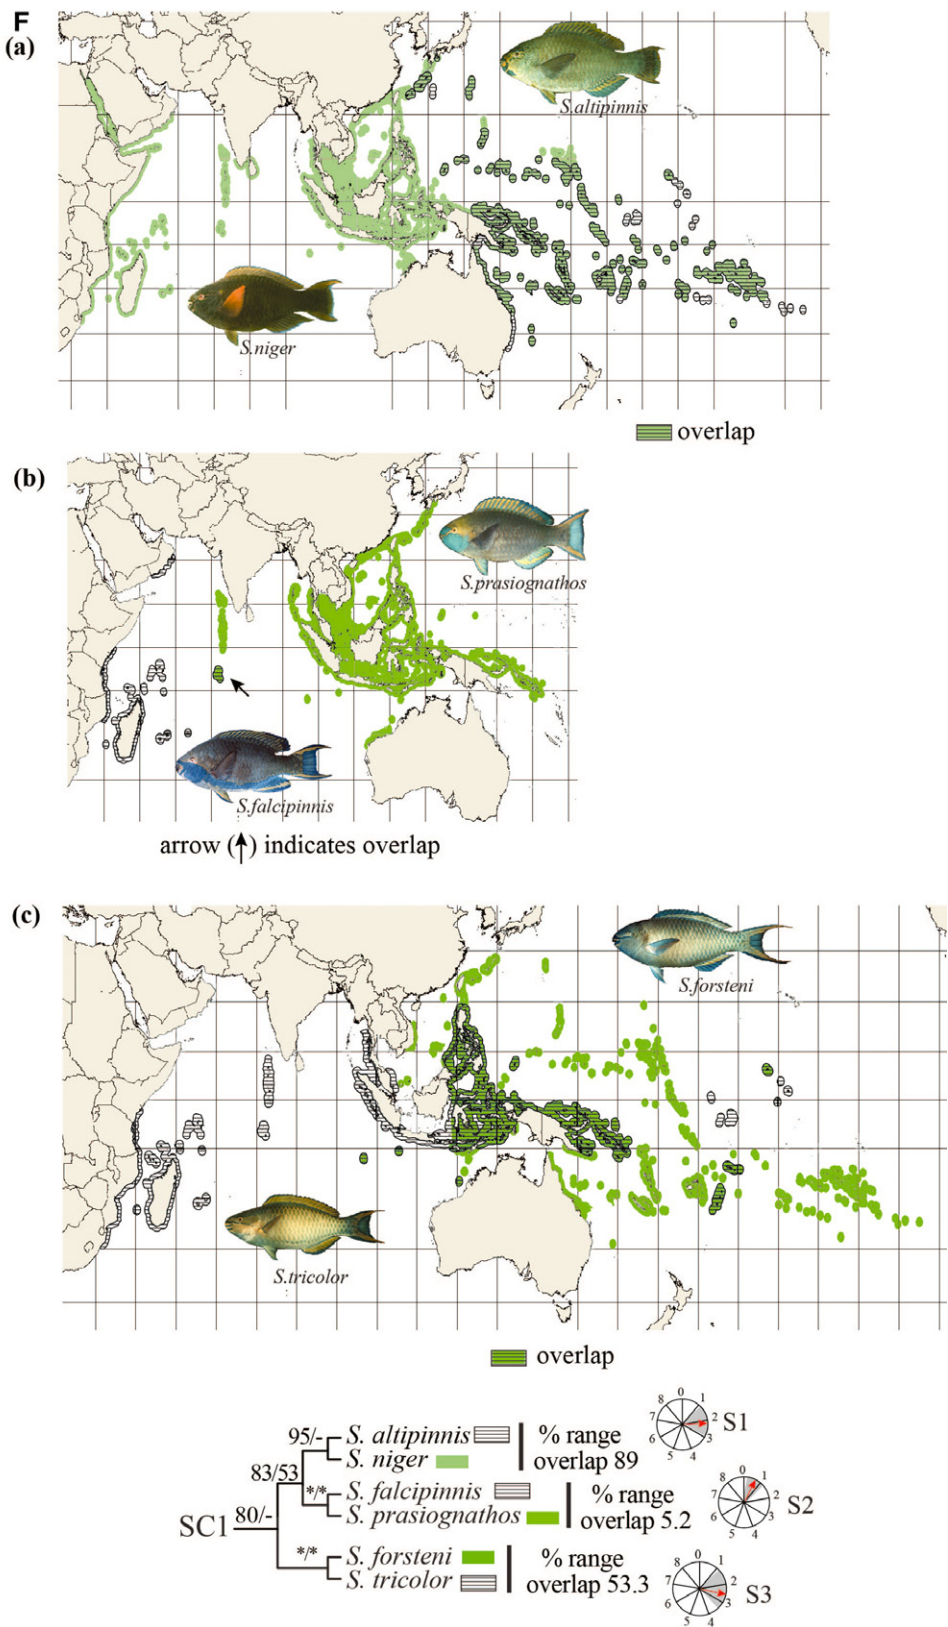

Figure 2. Continued

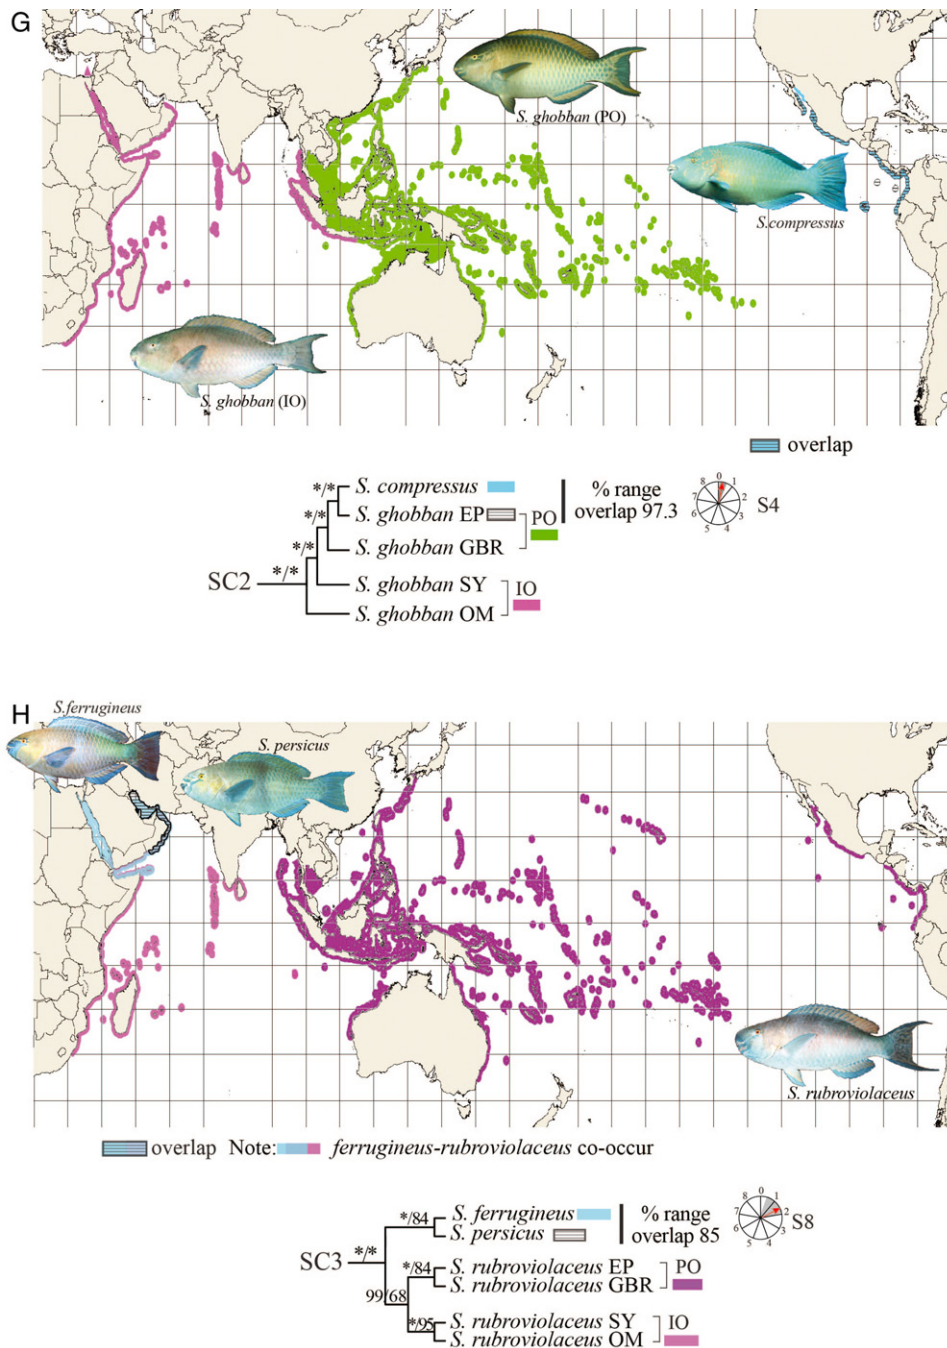

**Figure 2.** *Continued*

Table 2 identifies the 22 sister species with six *Chlorurus* and 16 *Scarus* (12 Indo-Pacific, four Tropical Atlantic). There were clear distinctions between the mean percentage distributional overlap observed in allopatry (1.9%) and sympatry (79.7%). However, the mean evolutionary age estimates for allopatric ( $1.48 \pm 0.24$  Mya) and sympatric sister pairs ( $1.55 \pm 0.32$  Mya) could not be separated and the former age range spanned that of the latter (ranges

of 2.24 to 1.72 and 1.23 to 1.87 Mya, respectively). Sympatric sister pairs, even including those with very young evolutionary ages, had diverged in range sizes and habitat association (see Supporting information, Table S3).

Among five of the eight sympatric pairs, one pair-member tended to have a much smaller geographical range and colonize habitats on continental and high island shelf systems. In such cases, the other member

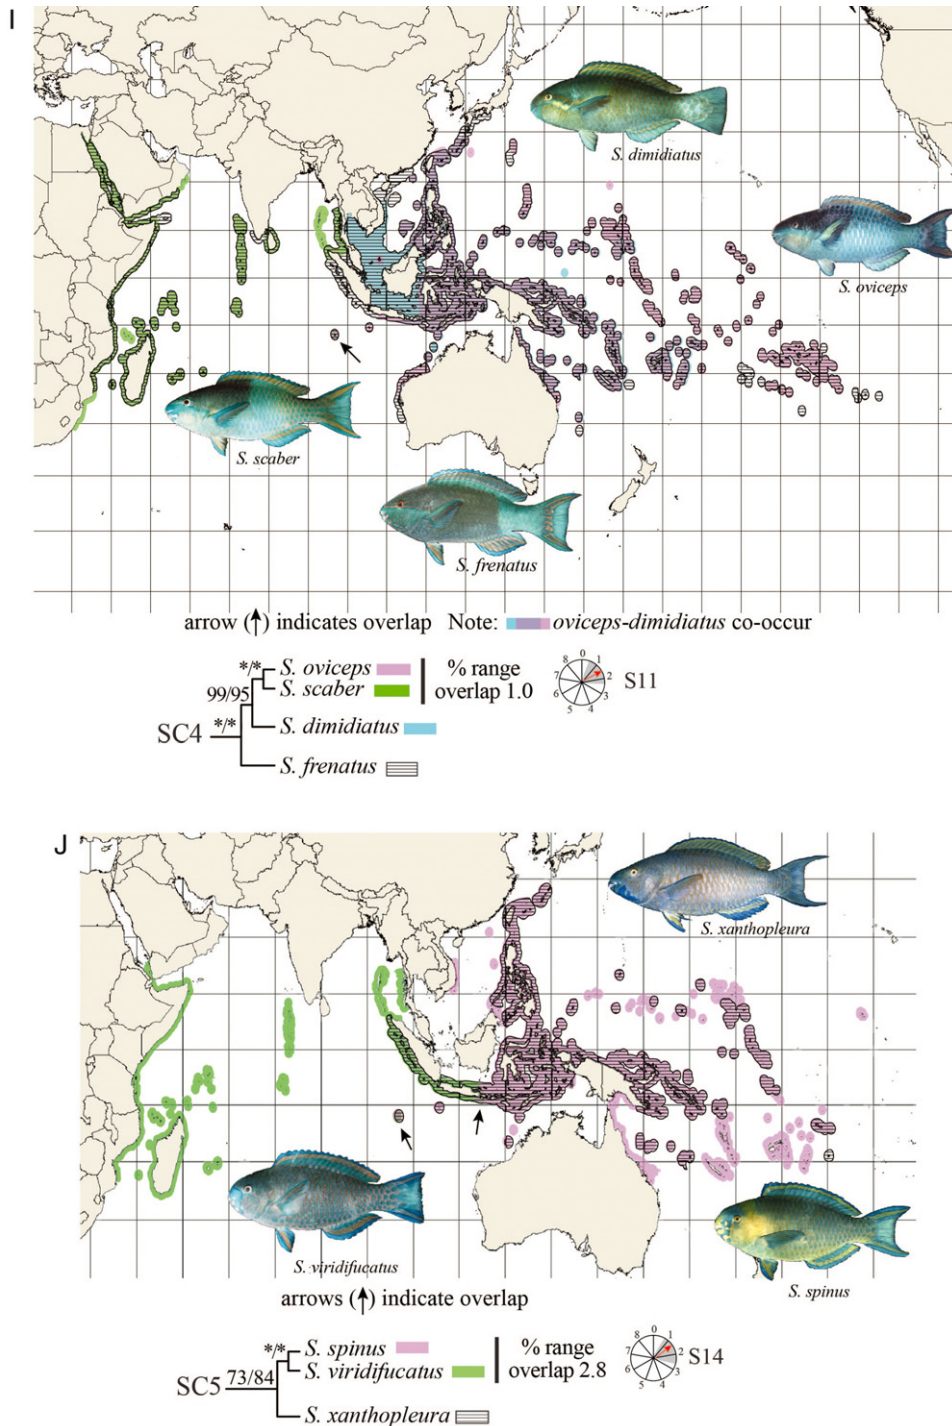

Figure 2. Continued

displayed a more extensive distribution over oceanic reef systems, and its range encompassed all or the great majority of the range of the former. Examples include C1 *C. bowersi*/*C. bleekeri* (Fig. 2A), S1 *S. niger*/*Scarus altipinnis* (Fig. 2F), S8 *Scarus ferrugineus*/*S. persicus* (Fig. 2H), S22 *Scarus rivulatus*/*Scarus*

*globiceps*, and S23 *Scarus chameleon*/*Scarus festivus* (Fig. 2L). The differences were most striking where one member of a species pair ranged over the oceanic Island systems of both the Indian and Pacific Oceans (*S. globiceps*/*S. rivulatus*) with *S. rivulatus* being associated with continental margins including the

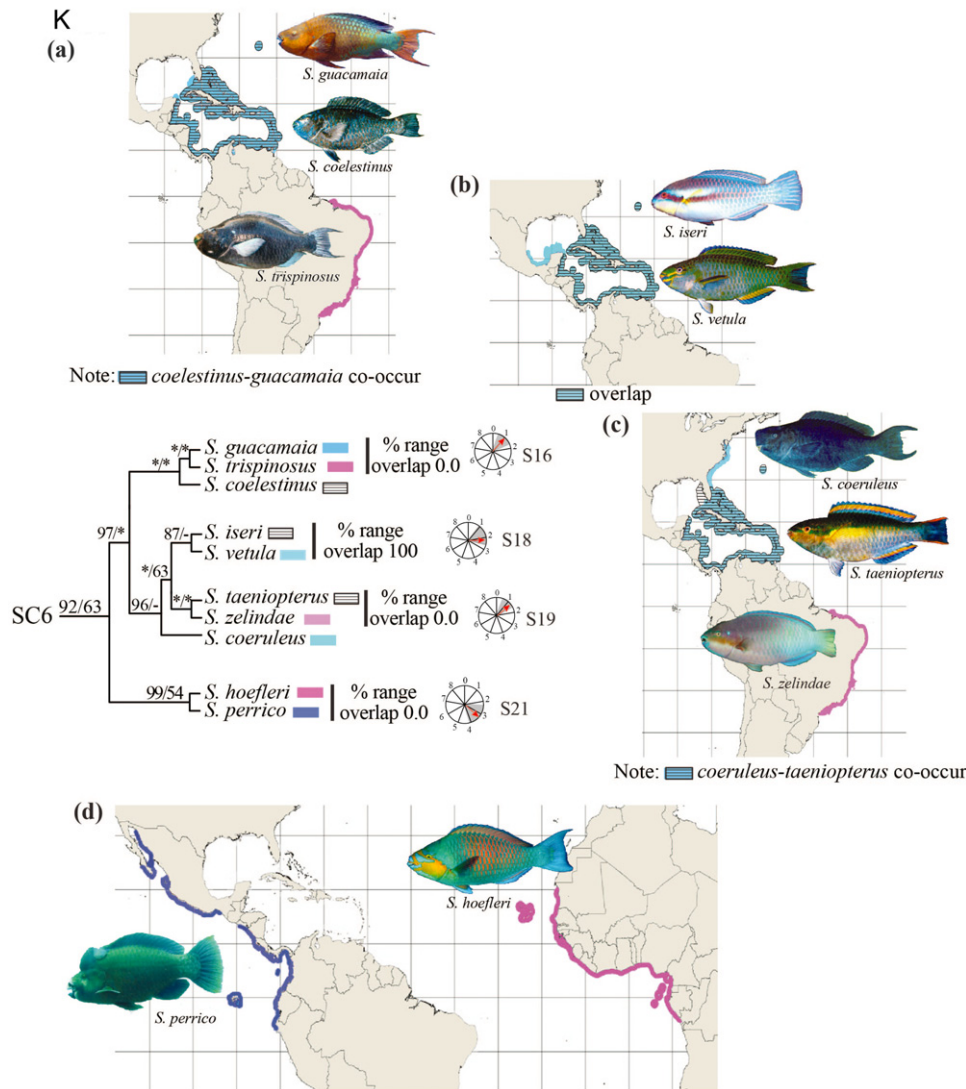

**Figure 2.** *Continued*

newly inundated Sunda Shelf (see Supporting information, Table S3). The remaining sympatric species (S3, S4, S18; Fig. 2) pairs showed similar range sizes for each member of the pair. In summary, there is some evidence that sympatric sister species, even those of relatively young evolutionary ages, will rapidly diverge in terms of range sizes and habitat characteristics. Although this suggests that sympatric sister pairs may diverge in range size and habitat association, this needs to be confirmed by a more extensive analysis of allopatric species pairs.

Divergence in ecological traits in allopatric versus sympatric groups was evaluated by comparing the pattern of evolutionary relationships in the phylogeny (Fig. 4A) with a dendrogram of the same species based on ecologically relevant morphological and meristic variables. These included head and jaw proportions

and body dimensions (Fig. 4B). The molecular and morphological trees were largely congruent at the generic level. However, within each genus, there were groups that were similar to or had diverged from those in the molecular tree. The dendrogram retrieved three clusters with distinctive suites of morphological characters. Cluster 1 consisted of relatively small members of *Scarus* characterized by acute head profiles with reduced cheek depths and partially concealed dental plates. Cluster 2 was dominated by members of the genus *Chlorurus* and the older taxa of *Scarus* *S. zufar*, *S. arabicus*, and *S. perrico*. These three species displayed morphologies, including obtuse head profiles, increased cheek depth, and large prominent dental plates, similar to those of *Chlorurus*. The third cluster consisted of the largest species of *Scarus* and *Chlorurus*, including the distinctive clade of large excavating



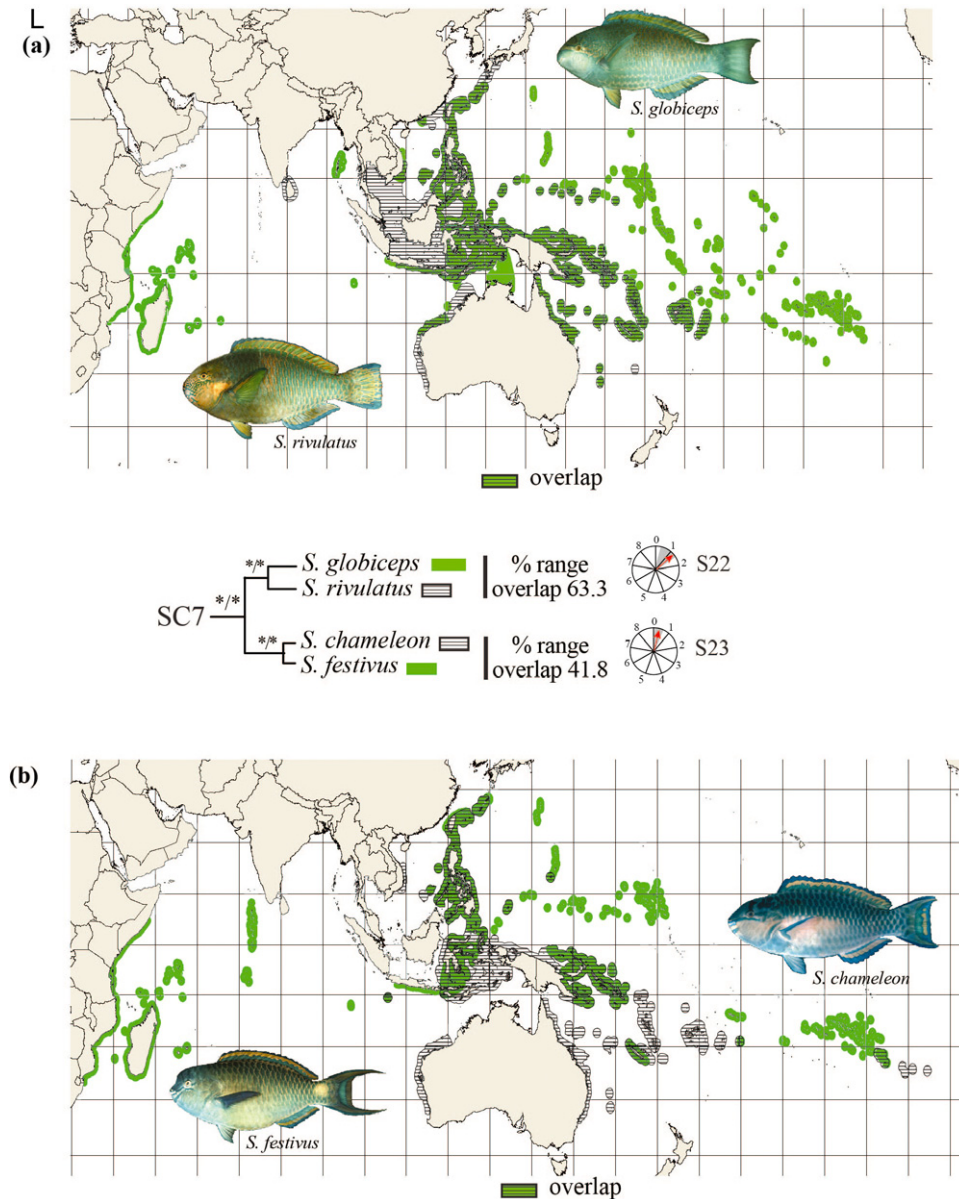

**Figure 2.** *Continued*

species *Chlorurus microrhinos/strongylocephalus/gibbus*. At a finer scale, large elements of the allopatric clades CH2, CH4, CH5, SC1, and SC10 were mirrored in the morphological dendrogram, whereas the integrity of the sympatric clades (Fig. 4A) was lost with the exception of a single example (*S. persicus/S. ferrugineus*); morphological differentiation occurred in seven of eight sympatric pairs but only in five of 14 allopatric pairs.

We also observed differences in colour patterns between sister species with sympatric versus allopatric distributions. This was notable in the terminal phases including the sympatric pairs *C. bleakeri/*

*C. bowersi* (CH1) and *S. niger/S. altipinnis* (SC1). The former displayed striking differences in the head region of the terminal colour phases (TP) (Fig. 2A). In the *S. niger/S. altipinnis* pair, the differences were even more pronounced, and involved changes to the whole body colour pattern (Fig. 2F). In allopatric members of this same clade (i.e. *S. altipinnis/Scarus prasiognathus/S. falcipinnis*), the differences were the result of modifications to a basic pattern, rather than the development of fundamentally different patterns. This is shown more explicitly in SC10, where colour patterns in the allopatric clade members *Scarus schlegeli/Scarus russelii/*

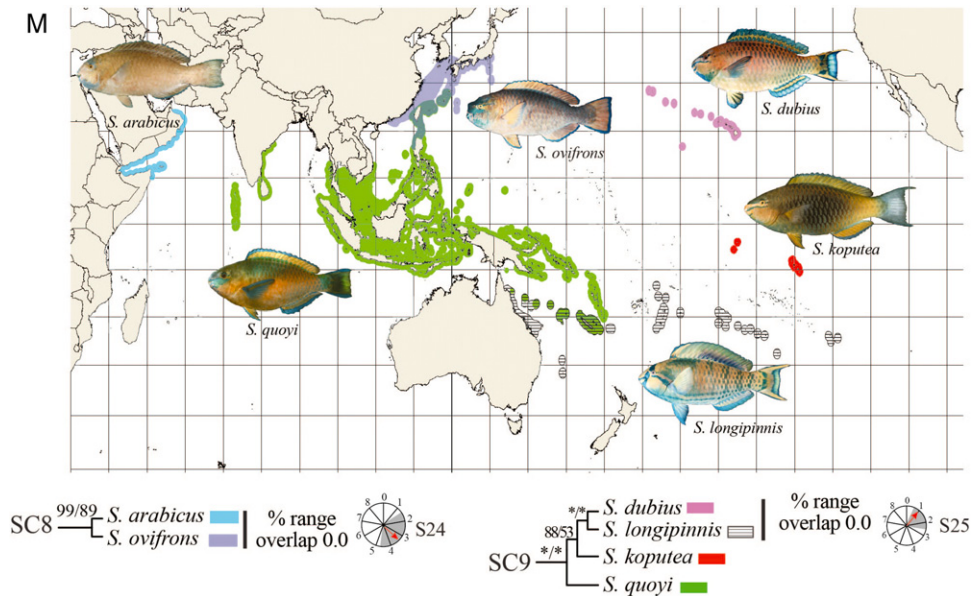

**Figure 2.** *Continued*

*Scarus fuscopurpureus* display only minor modifications to the basic terminal colour phase. The main features of colour pattern differentiation in sympatric and allopatric sister species are shown in Figure 5. Examples of terminal phase differentiation in sympatric sister species are shown in Figure 5 I (1A–3B). The greatest differences occur in the head region, and clearly illustrate the contrasts with the TP phase of allopatric sister taxa in Figure 5 I (4A–5B). The diagrams are scaled to size to illustrate the differences in the body size trait for sympatric sister taxa.

Differences between sympatric sister-species pairs and allopatric sister-species pairs were also apparent in the initial colour phase patterns (Fig. 5 II, 6A–7C). Figure 5 III (8A, B) illustrates the possible loss of an entire colour phase, as seen in tropical Atlantic sympatric species.

## DISCUSSION

Our phylogenetic reconstruction provides a comprehensive analysis of the evolutionary relationships of the genera *Scarus* and *Chlorurus*. Although previous studies included a relatively small number of species (31 versus 61) (Alfaro *et al.*, 2009; Kazancıoğlu *et al.*, 2009), such analyses retrieved similar patterns of clade structure to those reported in the present study. These included a distinctive clade of Atlantic species, a basal clade of *Scarus* containing *S. schlegeli* and *Scarus flavipectoralis*, and a more recent clade of wide-spread species including *S. altipinnis*, *S. prasiognathus*, and *S. niger*. Increased taxon sampling enabled us to identify pairs of sister species and also

local endemics that were critical in reconstructing the probable course of evolutionary events.

Distributional analyses revealed that sister taxa varied from spatially isolated to completely overlapping. In the Indo-Pacific, species boundaries were co-incident with ocean basin boundaries, with species overlap occurring largely in the central region (Coral Triangle). In the tropical Atlantic, geographical breaks occurred between the Caribbean and the Brazilian coast, with sister-species overlap confined to the Caribbean. In all three oceans, species with small range sizes were geographically peripheral and confined to marginal coral reef habitats in the north-western Indian Ocean, the Eastern Indo-Pacific and the Tropical East Pacific. These were dominated by older lineages and may represent relictual distributions. Timing of divergence suggested that distributional sympatry could be rapidly achieved and was often associated with habitat divergence. Our conclusion that different taxonomic groups of reef species will vary in their evolutionary histories mirrors that of Malay & Paulay (2010). Compared to most other labrid tribes (Barber & Bellwood, 2005; Cowman & Bellwood, 2011; Hodge *et al.*, 2012), scarines have a brief evolutionary history, colonizing coral reefs well after the Miocene.

In previous studies (Streelman *et al.*, 2002; Streelman & Danley, 2003; Smith *et al.*, 2008; Kazancıoğlu *et al.*, 2009), adaptive radiation driven by both natural and sexual selection was seen as the dominant process driving cladogenesis. By contrast, our results suggest that diversification of *Chlorurus* and *Scarus* involved a number of processes, including a

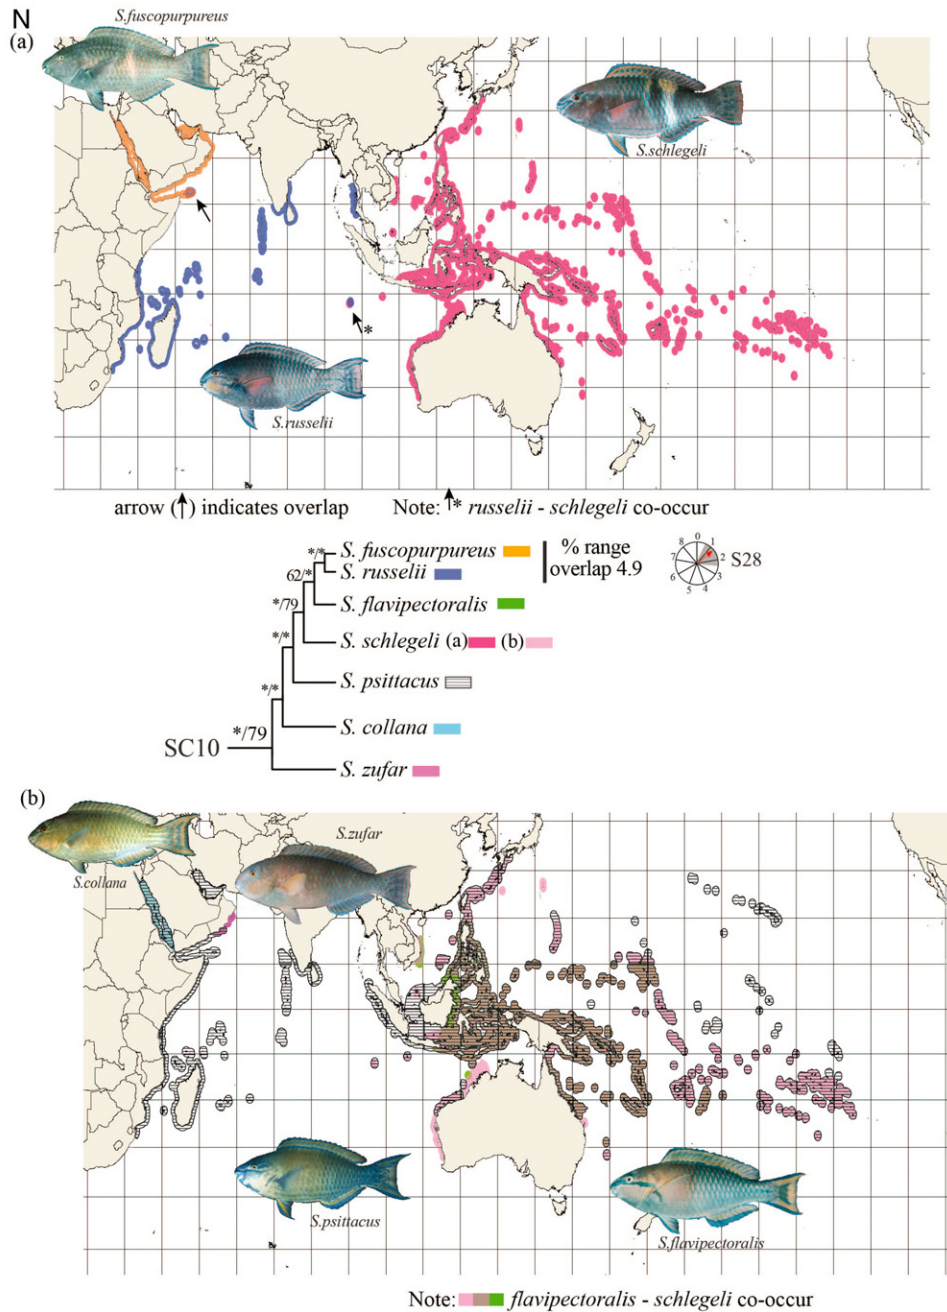

Figure 2. Continued

major role for allopatric speciation (i.e. genetic isolation associated with geographical isolation) (Table 2), which mirrors the findings of Robertson *et al.* (2006). This does not imply that natural or sexual selection played no role in allopatric divergences (Sobel *et al.*, 2010); rather, we observe that, in contrast to the situation in the majority of sympatric species pairs, we found only minor eco-morphological and colour differences in more than 70% of allopatric species pairs. Moreover, we do not seek to draw a line

between allopatry and sympatry because much work remains to be done on the influence of reinforcement both in species pairs that have diverged sympatrically and in pairs that have undergone allopatric divergence and then come into secondary contact.

PHENOTYPIC DIVERSIFICATION IN A COMPLEX TAXON  
In comparison to sympatric sister pairs, allopatric species pairs tended to maintain their integrity in the

**Table 2.** Comparative sister-species distribution, percentage overlap, and nodal age data for *Chlorurus* and *Scarus*

| Clade | Node | Sister-species pair                | Range size (km <sup>2</sup> ) | % Overlap | Classification | Mean age (Myr) |
|-------|------|------------------------------------|-------------------------------|-----------|----------------|----------------|
| CH1   | C1   | <i>Chlorurus bleekeri</i>          | 9 876 807                     | 74.6      | Sympatric      | 2              |
|       |      | <i>Chlorurus bowersi</i>           | 2 081 582                     |           |                |                |
|       | C2   | <i>Chlorurus spilurus</i>          | 14 186 253                    | 9.1       | Allopatric     | 1.64           |
|       |      | <i>Chlorurus sordidus</i>          | 3 469 970                     |           |                |                |
| CH2   | C3   | <i>Chlorurus strongylocephalus</i> | 2 699 067                     | 0         | Allopatric     | 0.49           |
|       |      | <i>Chlorurus gibbus</i>            | 353 841                       |           |                |                |
| CH3   | C5   | <i>Chlorurus capistratoides</i>    | 1 463 773                     | 3.4       | Allopatric     | 1.46           |
|       |      | <i>Chlorurus atrilunula</i>        | 769 300                       |           |                |                |
| CH4   | C7   | <i>Chlorurus oedema</i>            | 2 081 853                     | 0         | Allopatric     | 1.04           |
|       |      | <i>Chlorurus rhakoura</i>          | 202 584                       |           |                |                |
| CH5   | C9   | <i>Chlorurus frontalis</i>         | 7 250 285                     | 0         | Allopatric     | 1.17           |
|       |      | <i>Chlorurus enneacanthus</i>      | 812 265                       |           |                |                |
| SC1   | S1   | <i>Scarus altipinnis</i>           | 7 145 917                     | 89        | Sympatric      | 2.11           |
|       |      | <i>Scarus niger</i>                | 15 107 680                    |           |                |                |
|       | S2   | <i>Scarus prasiognathus</i>        | 7 817 368                     | 5.2       | Allopatric     | 0.82           |
|       |      | <i>Scarus falcipinnis</i>          | 1 448 781                     |           |                |                |
|       | S3   | <i>Scarus forsteni</i>             | 9 534 855                     | 53.3      | Sympatric      | 2.71           |
|       |      | <i>Scarus tricolor</i>             | 6 834 711                     |           |                |                |
| SC2   | S4   | <i>Scarus compressus</i>           | 675 634                       | 97.3      | Sympatric      | 0.17           |
|       |      | <i>Scarus ghobban</i>              | 657 250                       |           |                |                |
| SC3   | S8   | <i>Scarus ferrugineus</i>          | 993 856                       | 85.3      | Sympatric      | 1.69           |
|       |      | <i>Scarus persicus</i>             | 385 316                       |           |                |                |
| SC4   | S11  | <i>Scarus oviceps</i>              | 9 383 490                     | 1         | Allopatric     | 1.67           |
|       |      | <i>Scarus scaber</i>               | 2 976 033                     |           |                |                |
| SC5   | S14  | <i>Scarus spinus</i>               | 7 358 255                     | 2.8       | Allopatric     | 1.35           |
|       |      | <i>Scarus viridifucatus</i>        | 2 725 554                     |           |                |                |
| SC7   | S22  | <i>Scarus globiceps</i>            | 11 363 068                    | 96.2      | Sympatric      | 1.23           |
|       |      | <i>Scarus rivulatus</i>            | 9 317 924                     |           |                |                |
|       | S23  | <i>Scarus festivus</i>             | 6 690 884                     | 41.8      | Sympatric      | 0.35           |
|       |      | <i>Scarus chameleon</i>            | 6 040 865                     |           |                |                |
| SC8   | S24  | <i>Scarus ovifrons</i>             | 1 319 771                     | 0         | Allopatric     | 3.59           |
|       |      | <i>Scarus arabicus</i>             | 480 716                       |           |                |                |
|       | S25  | <i>Scarus longipinnis</i>          | 1 599 827                     | 0         | Allopatric     | 0.94           |
|       |      | <i>Scarus dubius</i>               | 391 017                       |           |                |                |
|       | S28  | <i>Scarus russelii</i>             | 1 935 709                     | 4.9       | Allopatric     | 1.08           |
|       |      | <i>Scarus fuscopurpureus</i>       | 866 127                       |           |                |                |
| SC6   | S16  | <i>Chlorurus guacamaia</i>         | 2 545 215                     | 0         | Allopatric     | 1.01           |
|       |      | <i>Scarus trispinosus</i>          | 612 146                       |           |                |                |
|       | S18  | <i>Scarus vetula</i>               | 2 840 937                     | 100       | Sympatric      | 2.17           |
|       |      | <i>Scarus iseri</i>                | 2 531 600                     |           |                |                |
|       | S19  | <i>Scarus taeniopterus</i>         | 2 634 247                     | 0         | Allopatric     | 1.07           |
|       |      | <i>Scarus zelindae</i>             | 612 146                       |           |                |                |
|       | S21  | <i>Scarus hoefleri</i>             | 797 547                       | 0         | Allopatric     | 3.4            |
|       |      | <i>Scarus perrico</i>              | 760 076                       |           |                |                |

Percentage overlap estimated as the proportion of the species with smaller range size that live within the distribution of the larger range size. (Barracough & Vogler, 2000) Sympatry > 10% overlap; allopatry < 10% overlap. Mean nodal ages from Table 1.

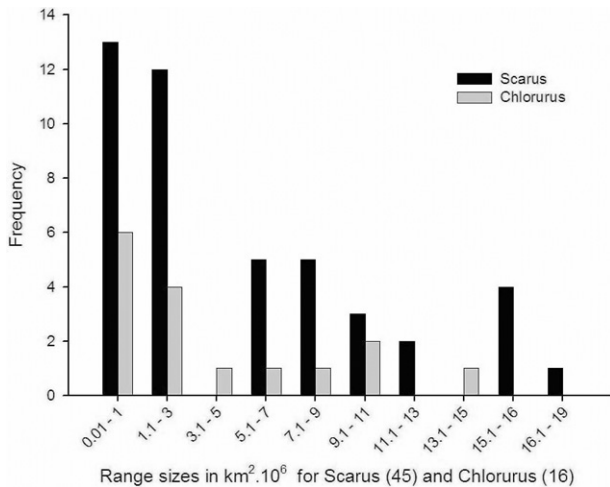

**Figure 3.** Frequency distribution of range sizes as  $\text{km}^2 \times 10^6$  for all species by genus: *Scarus* ( $N = 45$ ); *Chlorurus* ( $N = 16$ ).

cluster analysis based on body dimensions and size, head-shape, and dental plate metrics. This implies ecological similarity among allopatric species pairs, which also showed relatively small differences in colour pattern (Figs 4B, 5). Examples are seen in the *S. schlegelirusselii/fuscopurpureus* and *Chlorurus microrhinus/strongylocephalus/gibbus* complexes (Fig. 2B, N). Sympatric sister-species pairs displayed greater differences in morphology, size (Fig. 4B), and colour pattern traits (Fig. 5). In addition to extreme differentiation in terminal colour phase (e.g. *S. altipinnis/niger*) (Fig. 2F), the loss of an entire colour phase in each of the co-occurring species as seen in *S. guacamaia/coelestinus* represents another potential mechanism for reproductive differentiation in sympatric sister species.

A further difference in ecological traits among sympatric sister species occurred in the relative size of their geographical distributions and types of reef habitats occupied. The sympatric pair *C. bleekeri/bowersi* (Clade CH1) displayed a 130% difference in their range areas, a reflection of the colonization of western and central Pacific oceanic reefs by *C. bleekeri* (Fig. 2A; see also Supporting information, Table S3). The sister pair *S. festivus/chameleon* (SC 7), with a very recent time of divergence (0.35 Mya), provides an even more striking example. *Scarus festivus* inhabits oceanic reefs of both the Indian and Pacific Oceans, whereas its sister species *S. chameleon* is confined to high island and continental shelf reefs of the Indo-Australian archipelago. A similar pattern is seen in the pair *S. rivulatus/globiceps* (SC 7), which, despite a modest evolutionary age (1.2 Mya), displayed marked differences in longitudinal range, size, and terminal phase colour pattern.

*Scarus rivulatus* is one of the few species to successfully colonize the recently inundated and largely non-reefal areas of the Sunda Shelf (see Supporting information, Table S3). This division in habitats between closely-related species is similar to that recorded for clades of the gastropod *Drupella* (Clearmont, Reid & Williams, 2011) and Atlantic labrid fishes (Rocha *et al.*, 2005). However, a more comprehensive comparison of range sizes and habitat associations in allopatric species pairs, and which also controls for ocean-basin differences in reef area and habitat structure, is required to fully flesh out and test this comparison. Our data indicate that allopatric and sympatric sister species have similar evolutionary ages and provide little evidence of increased time to sympatry. The relatively low mean values for the evolutionary ages of sympatric pairs may reflect the rapid divergence of sisters in sympatry, or the re-establishment of sympatry after rapid allopatric divergence.

Evolution in the tropical Atlantic involved fewer species, with sympatry as the dominant distributional pattern. This group displayed the greatest disparity in sizes recorded among the species in the present study, with *S. guacamaia* achieving a maximum weight 100-fold greater than in the smallest species, *S. iseri*. However, the two sympatric members of the clade containing *S. guacamaia*, *S. trispinosus* and *S. coelestinus*, (*S. guacamaia* and *S. coelestinus*), are similar in body size and shape, although they differ greatly in colour pattern: bronze and green versus black and blue. The pairs *S. taeniopterus/zelindae* and *S. guacamaia/trispinosus* displayed allopatric distributions, with the former in each case confined to the Caribbean and the latter to Brazil. These recently diverged (1.0 Mya) species pairs each represent the same scenario of geographical isolation, with Amazon outflow constituting a barrier (Rocha & Bowen, 2008) as described for species of *Sparisoma* (Robertson *et al.*, 2006). A third allopatric pair, *S. hoefleri/perrico*, diverged 3.4 Mya before the closure of the isthmus.

#### COLONIZATION OF REEF HABITATS AND THE ESTABLISHMENT OF PRESENT DAY BIOGEOGRAPHICAL PATTERNS

The chronology of the Indo-Pacific species of *Scarus* offers clues to the origin of the tropical Atlantic assemblage. Given the age of this genus, it is unlikely that the tropical Atlantic fauna has a Tethyan origin. Earlier studies, Bellwood (1994) and Smith *et al.* (2008) suggested that *Scarus* arose in the Indo-Pacific and repeatedly crossed the east Pacific barrier before the closure of the Panamanian Isthmus, implying entry to the Atlantic from the west. Smith *et al.* (2008) identified *S. ghobban* as the likely ancestor of



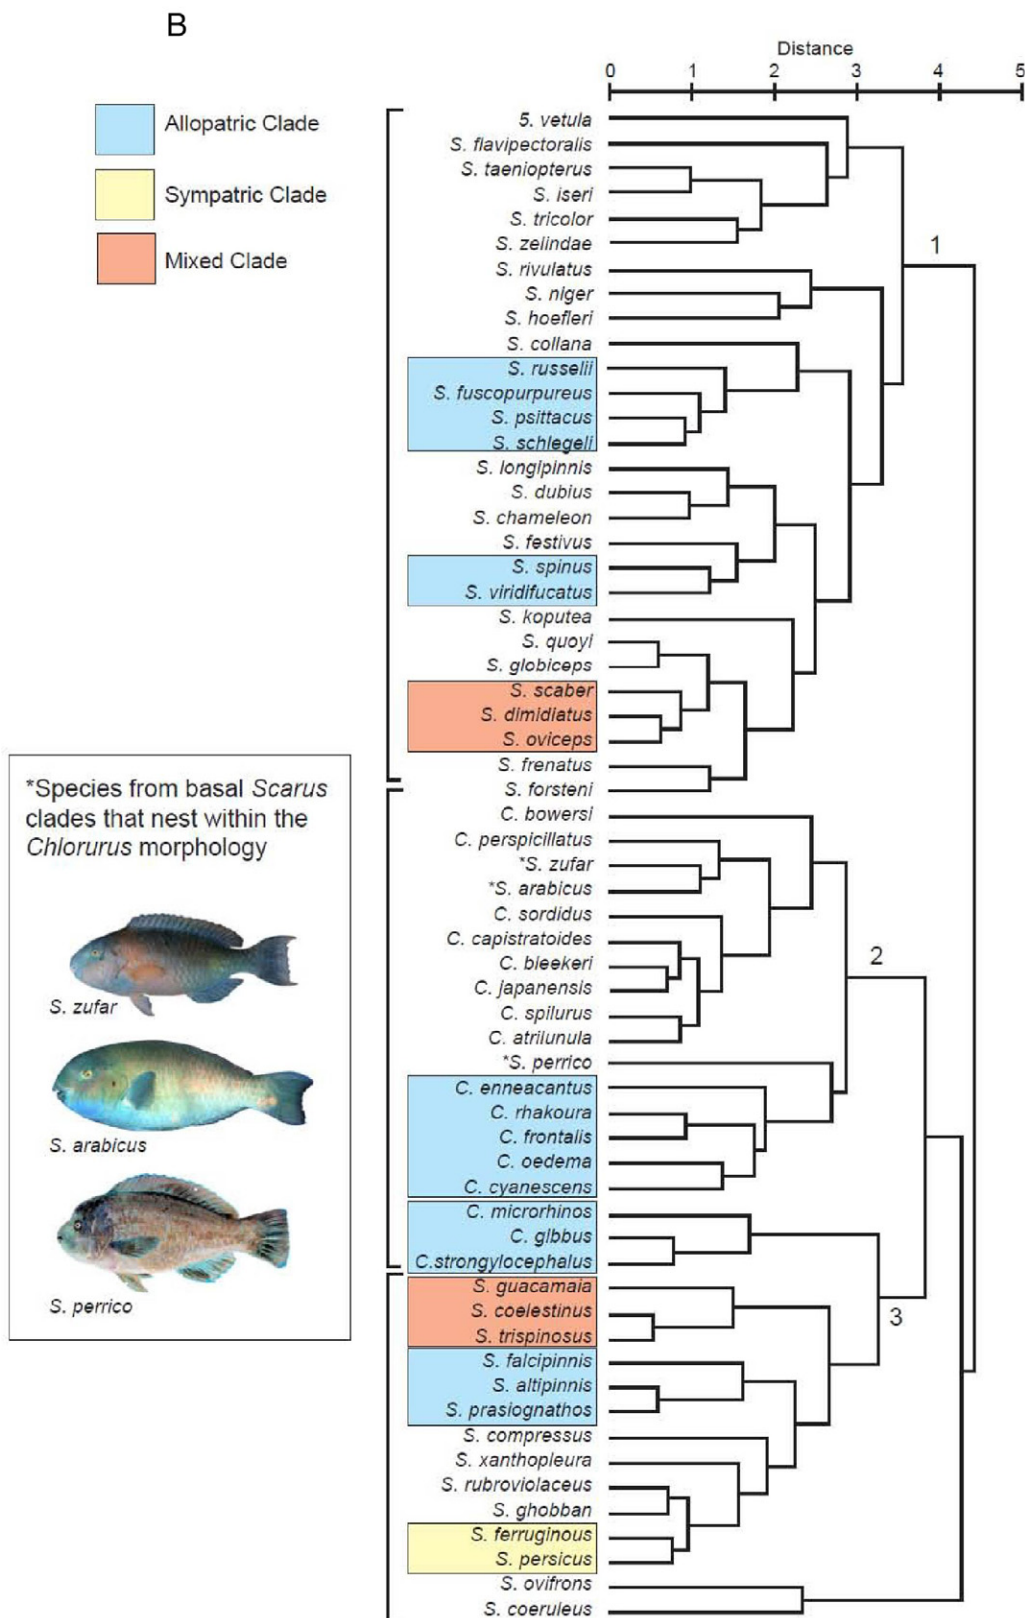

Figure 4. Continued

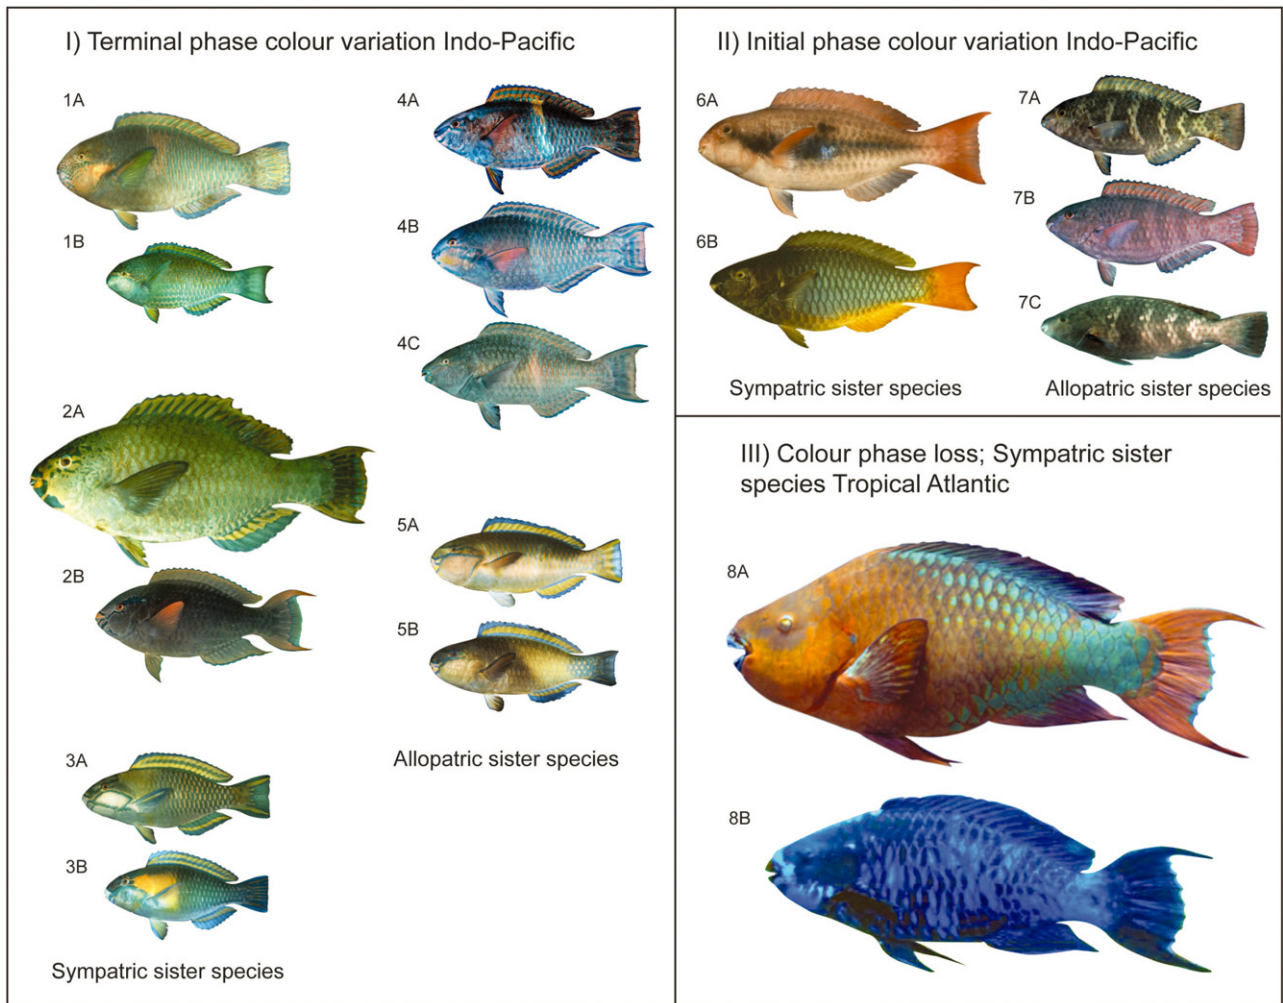

**Figure 5.** Comparison of colour patterns in sympatric and allopatric sister species showing three patterns of divergence. Images are scaled to mean Fork Length (FL) mm. I, divergence of terminal phase colour patterns in sympatric and allopatric Indo-Pacific species. Sympatric sister species: 1A *Scarus rivulatus*; 1B *Scarus globiceps*; 2A *Scarus altipinnis*; 2B *Scarus niger*; 3A *Chlorurus bleekeri*; 3B *Chlorurus bowersi*. Allopatric sister species: 4A *Scarus schlegeli*; 4B *Scarus russelii*; 4C *Scarus fuscopurpureus*; 5A *Chlorurus capistratooides*; 5B *Chlorurus japanensis*. II, divergence of initial phase colour patterns in sympatric and allopatric Indo-Pacific species. Sympatric sister species: 6A *Scarus forsteni*; 6B *Scarus tricolor*. Allopatric sister species: 7A *Scarus schlegeli*; 7B *Scarus russelii*; 7C *Scarus fuscopurpureus*. III, loss of one colour phase. Sympatric tropical Atlantic species: 8A *Scarus guacamaia*; 8B *Scarus coelestinus*.

the Atlantic fauna. However, the diversification of the widespread clades that include *S. ghobban* and *S. rubroviolaceus*, both of which have colonized the east Pacific, appears to be relatively recent (Lessios & Robertson, 2006; Fitzpatrick *et al.*, 2011), implying arrival at the eastern margins of their range well after the closure of the Isthmus. *Scarus compressus* and *S. perrico* provide contrasting chronologies, with the former being an east Pacific sister to *S. ghobban*, and the product of the most recent divergence within the genus (Tables 1, 2). *Scarus perricois* is a relatively ancient East Pacific endemic and sister to the West African endemic *S. hoefleri*. This raises the possibility

that an ancestral *Scarus* colonized the Atlantic around southern Africa from the Indian Ocean, migrated through the Atlantic, and passed westwards through the Central American Isthmus to produce *S. perrico*. We cannot exclude the possibility that the common ancestor of the *S. perrico/hoefleri* pair was the product of an earlier diversification of the Indo-Pacific *Scarus* fauna that crossed the east Pacific barrier before the closure of the Isthmus but, given the time frame of Indo-Pacific diversification and easterly migration, this is less likely.

The geographical distribution and divergence times of the endemic species *S. zufar*, *S. collana*, and



*S. arabicus* (Fig. 2M, N) suggests that the initial diversification of *Scarus* took place in the western margin of the Indo-Pacific, with progressive migration eastwards. This culminated in the arrival in the east Pacific of the colonizing clades of *S. rubroviolaceus* and *S. ghobban* in the mid to late Pleistocene. In addition, diversification of clade SC9 is associated with a progressive eastwards colonization, resulting in a number of central Pacific endemics (e.g. *S. koputea*, *S. dubius*) that are associated with isolated island habitats (Fig. 2N). The provenance of *Chlorurus* is less clear. The location of the endemic *C. perspicillatus* in Hawaii and the greater ages of Pacific clades of *Chlorurus spilurus* relative to *Chlorurus sordidus* (Beck, 2011) suggest a Pacific origin and westerly expansion, with the most recent divergence, *C. gibbus*, arising in the Red Sea.

Both genera contain distinctive endemic species, a number of which are associated with marginal reef habitats at the periphery of the Indo-Pacific and the tropical Atlantic. Fifteen such species with range sizes of  $< 0.8 \times 10^6$  km<sup>2</sup> were identified (see Supporting information, Table S3). However, these species displayed a wide range of ages, suggesting that a number of evolutionary processes have acted on peripheral populations. Six species (i.e. *S. zufar*, *S. arabicus*, *S. collana*, *S. perrico*, *S. hoefleri*, and *Chlorurus perspicillatus*) occupied basal positions in their relevant clades, and share a mean evolutionary age of  $4.04 \pm 0.34 \times 10^6$  years. All are located in geographically peripheral habitats, with four restricted to ecologically marginal coral reef habitats. This pattern suggests that the ancestral habitats of *Scarus* at least were rocky rather than coral reefs, and that colonization of well developed coral reefs occurred late in the evolutionary history of the clade. At least three of these species, namely *S. perrico* (east Pacific), *S. arabicus*, and *S. zufar* (Oman and the Gulf of Aden), possess robust exposed dental plates, obtuse head profiles, and extensive cheek areas, which are characters that group them morphologically with the excavating genus *Chlorurus* (Fig. 4B). It is not known whether these shared anatomical features result in the same biting mechanics and power as seen in *Chlorurus*, although one interpretation is that these endemics represent an earlier radiation of the genus *Scarus* (Rosenblatt & Hobson, 1969) adapted to rocky reef substrata. A strong association with the fronts and crests of well-developed reef systems dominated by calcium carbonate substrata is more evident in *Chlorurus* and in the most recently diverged clades of *Scarus*.

A second group of restricted range species, *S. compressus*, *S. trispinosus*, *S. zelindae*, *S. dubius*, and *C. gibbus*, appeared very recently, with a mean age of diversification of  $0.74 \pm 0.17 \times 10^6$  years. In the case of

*S. trispinosus*, *S. zelindae*, *S. dubius*, and *C. gibbus*, this appears to represent divergence after geographical isolation. In taxa such as *S. compressus* the process is unclear. This may represent peripatric speciation from a larger, more widespread population (Pacific populations of *S. ghobban*), or sympatric divergence from a smaller, distinct East Pacific population of *S. ghobban*. This example emphasizes the need for additional population genetic scrutiny not only of *S. ghobban*, but also of other widespread species (e.g. *S. niger*, *S. frenatus*, and *S. globiceps*) because these taxa may represent unrecognized species complexes.

#### CONCLUSIONS AND FUTURE STUDIES

##### *Speciation and the nature of evolutionary processes underlying diversification of sympatric sister taxa*

Previous reviews of the evolution of parrotfishes considered them to be exemplars of a model of adaptive radiation in which the component species diverged sequentially along axes of habitat, trophic morphology, and communication (reproduction). By contrast, our analyses revealed examples of contemporaneous patterns of both neutral (drift in allopatry) and adaptive (natural and sexual selection in sympatry) divergence, and did not support the concept of a single dominant sequential process underlying diversification. Moreover, we saw little evidence of a pattern of sequential and independent episodes of natural (i.e. on ecological characters) and sexual selection in parrotfish evolution. We conclude that interactions among ecological and reproductive traits provide a more plausible explanation for species diversification, with the order and intensity of these being influenced by the environmental setting in each case.

For the 64% of the sister species that are allopatric, divergence with genetic drift after isolation is the most plausible process. For sympatric species pairs, the processes are likely to be more variable. If local adaptation interacts with sexual selection then divergence in ecological and reproductive characteristics over relatively limited geographical scales and in the face of gene flow is plausible (van Doorn, Edelaar & Weissing, 2009; Maan & Seehausen, 2011). However, the complex geography of areas where range overlap is recorded would also allow for initial allopatric divergence followed by secondary range expansion to achieve contemporary sympatry. Further work is required to determine the degree to which natural and sexual selection have interacted, and whether divergence has occurred in the presence of gene flow (The Marie Curie Speciation Network\*, 2012). From the perspective of our results and conclusions, there are two priorities for future study: determining (1) the extent to which adaptive divergence has played a

role in parrotfish speciation and (2) the relationship between the rate of diversification and the intensity of natural and sexual selection.

#### *Temporal patterns in sister-species diversification*

A number of sympatric sister-species pairs (e.g. *S. festivus/chameleon*, *S. globiceps/rivulatus*) (Fig. 2L) displayed evidence of rapid and extensive colonization of Indo-Pacific reef systems over relatively short time periods. A process involving rapid expansion of geographical range size leading to overlap with the range of the sister taxon suggests that re-establishment of sympatry after allopatric divergence (Weir & Price, 2011) occurs rapidly. However, although it is possible to date the divergences of sister species, the evolutionary age of individual taxa is more problematical. Investigation of the alternative hypothesis (i.e. that the taxon with the greater range is in fact older than suggested by age estimates derived from estimates of sister divergences) (Hodge *et al.*, 2012) requires coalescence analysis of phylogeographical data (Marko & Hart, 2012). This is a priority for future research. The assumptions that: (1) widespread species such as *S. festivus* have been invariant over extended evolutionary time periods or (2) they cannot achieve widespread distributions within the Indo-Pacific in the time periods indicated, require further testing (Hodge *et al.*, 2012).

#### *What processes have driven the rapid diversification and colonization of coral reefs by parrotfishes?*

The most striking features of parrotfish evolution concern the apparent complexity of the speciation processes, rapid colonization of the world's tropical reefs, and the retention of relatively conservative morphologies and foraging modes at the same time as exploiting novel ecological opportunities. The structure and geographical organization that characterize present day coral reefs was established during the Miocene (Bellwood & Wainwright, 2002). Unlike other reef fish groups that underwent significantly increased diversification rates during this period (Cowman & Bellwood, 2011), parrotfishes diversified on coral reefs during the Pliocene, approximately 12 Myr after modern reefs were established (Alfaro *et al.*, 2009; Kazancıoğlu *et al.*, 2009). Thus, it is unlikely that parrotfishes were historically important in determining the biological organization of present day reefs. Three aspects of present day parrotfish habitat associations, diets and foraging modes, and distribution patterns, provide a focus for future studies. First, many of the older taxa presently occur in marginal reef habitats; are these representative of early environment of this group? Second, a number of taxa are associated with newly developed non-reef habitats and continental shores exposed by rising sea-levels

subsequent to the latest glaciations, as opposed to well developed oceanic reef systems. Is there a temporal sequence in habitat associations with occupancy of fringing reef habitats preceding colonization of well developed and oceanic reef systems? Third, to what extent does the exploitation of a resource base represented by the protein and lipids residing in benthic detrital and bacterial aggregates; the microbial, plant and meiofaunal, and plant assemblages; and living corals (Crossman, Choat & Clements, 2005) contribute to our understanding of the rapid diversification of parrotfishes on tropical reefs. Their role on present coral reefs and the history of this association remains an event of fundamental importance in reef ecology.

#### ACKNOWLEDGEMENTS

This study is dedicated to Dr John E. Randall. Without his instruction on the taxonomy and colour phases of parrotfishes, the first author would not have been able to undertake such a study. Research support was through the Queensland Government/Smithsonian Institution (STRI) Collaborative Funding to J.H.C and D.R.R., the National Geographic Grant Program to J.H.C and D.R.R., and by the JCU internal funding scheme and Program Grants. Logistic support for the sampling program was provided by the Seychelles Fisheries Authority and the research vessel 'L'Amitie'; the University of Guam Marine Laboratory; West Australian Fisheries, Lizard Island Research Station, (Australian Museum); National Museum Of Marine Science & Technology Taiwan Keelung; Instituto Nacional de Pesca y Acuicultura of Venezuela; the Department of Fisheries, Bahamas; the Bermuda Fisheries Department; the Bermuda Biological Station for Research; Caribbean Marine Research Centre at Lee Stocking Island; Cocos Keeling and Christmas Island National Parks Department of Environment and Heritage Australia; Sultan Qaboos University Oman; King Abdullah University of Science and Technology Saudi Arabia; and Silliman University Marine Laboratory, Philippines. Additional material was provided by Bishop Museum, Hawaii (J. E. Randall, A. Y. Suzumoto) National Museum of Marine Science & Technology Taiwan (Li Shu Chen), The Australian Museum (M. McGrouther), The Western Australian Museum (S. Morrison, G. Allen), D. Bellwood James Cook University, A. M. Ayling Sea Research Queensland, A. Lewis Tevene Queensland, R. L. Moura, Seção de Peixes, Museu de Zoologia, CP 42594 Universidade de São Paulo, São Paulo, Brazil, Osmar J. Luiz Jr., Departamento de Zoologia e Museu de História Natural, Universidade Estadual de Campinas, Campinas, SP, Brasil, C. E. L. Ferreira, Departamento de Biologia Marinha, Universidade Federal Fluminense, Niterói R. J., Brasil, S. R. Floeter, Laboratório de

Biogeografia e Macroecologia Marinha, Universidade Federal de Santa Catarina, Florianópolis S. C., Brasil, A. Halford, J. McIlwain, Sultan Qaboos University, Oman and University of Guam, R. Hamilton, The Nature Conservancy Brisbane. M. Meekan, Australian Institute of Marine Science, T. Hooper, Shoals Program Rodrigues, R. Abesamis, Silliman University. Acknowledgement of use of images: J. E. Randall, FishBase; Paul Humann, Government of US Virgin Islands. Laboratory assistance was provided by Julia Gardiner, Lara Upton, Vanessa Messmer, Lynda Axe, and Line Bay. For assistance with the distributional analyses, we thank Ben Radford, Australian Institute of Marine Science, Jonnell Sanciangco Old Dominion University, and Mia Theresa Comerros IUCN, Kayan Ma, James Cook University. Vivian Ward provided Figs 3 and 5. Analysis of colour patterns was assisted by U. Siebeck and J. Marshall Vision Touch and Hearing Research Centre, University of Queensland. The authors thank Lynda Axe, W. D. Robbins, J. L. Ackerman, and M. Berumen for assistance with the field collections. The manuscript was improved by discussions with D. Carlon, Luiz Rocha, P. Munday, D. Bellwood, R. Bonaldo, Elizabeth Trip, and G. Russ. We wish to thank two anonymous referees for comments on the manuscript. Collections in Australia were made under GBRMPA Permit numbers G01/356 and G03/3871.1 to the School of Marine Biology, James Cook University. The work was carried out under James Cook University Ethics Approval Nos. A503 and A 872-04.

## REFERENCES

- Alfaro ME, Brock CD, Banbury BL, Wainwright PC. 2009.** Does evolutionary innovation in pharyngeal jaws lead to rapid lineage diversification in labrid fishes? *BMC Evolutionary Biology* **9**: 255.
- Allen GR. 2008.** Conservation hotspots of biodiversity and endemism for Indo-Pacific coral reef fishes. *Aquatic Conservation: Marine and Freshwater Ecosystems* **18**: 541–556.
- Arnberger H, Arnberger E. 2001.** *The Tropical Islands of the Indian and Pacific Oceans*. Vienna: Austrian Academy of Sciences Press.
- Barber PH, Bellwood DR. 2005.** Biodiversity hotspots: evolutionary origins of biodiversity in wrasses (*Halichoeres*: Labridae) in the Indo-Pacific and new world tropics. *Molecular Phylogenetics and Evolution* **35**: 235–253.
- Barraclough TG, Vogler AP. 2000.** Detecting the geographical pattern of speciation from species-level phylogenies. *American Naturalist* **155**: 419–434.
- Beck E. 2011.** Comparative phylogeography of four Indo-Pacific scarine labrids. PhD Thesis, James Cook University.
- Bellwood DR. 1994.** A phylogenetic study of the parrotfish family Scaridae (Pisces: Labroidea), with a revision of genera. *Records of the Australian Museum* **20**: 1–86.
- Bellwood DR. 1996.** The Eocene fishes of Monte Bolca – the earliest coral reef fish assemblage. *Coral Reefs* **15**: 11–19.
- Bellwood DR. 1997.** Reef fish biogeography: habitat associations, fossils and phylogenies. Proceedings of the Eight International Coral Reef Symposium, Panama, 379–384.
- Bellwood DR. 1999.** Fossil pharyngognath fishes from Monte Bolca, Italy, with a description of a new pomacentrid genus and species. *Studi e Ricerche sui Giacimenti Terziari di Bolca* **8**: 207–217.
- Bellwood DR, Choat JH. 1990.** A functional analysis of grazing in parrotfishes (family Scaridae) : the ecological implications. *Environmental Biology of Fishes* **28**: 189–214.
- Bellwood DR, Schultz O. 1991.** A review of the fossil record of the parrotfishes (Labroidei: Scaridae) with a description of a new *Calotomus* species from the Middle Miocene (Badenian) of Austria. *Annalen des Naturhistorischen Museums in Wien* **92**: 55–71. 55 Fig., 54 Pls.
- Bellwood DR, Sorbini L. 1996.** A review of the fossil record of the Pomacentridae (Teleostei: Labroidei) with a description of a new genus and species from the Eocene of Monte Bolca, Italy. *Zoological Journal of the Linnean Society* **117**: 159–174.
- Bellwood DR, Wainwright PC. 2002.** The history and biogeography of fishes on coral reefs. In: Sale PF, ed. *Coral reef fishes, dynamics and diversity in a complex ecosystem*. San Diego, CA: Academic Press, 5–32.
- Bernardi G, Crane NL. 1999.** Molecular phylogeny of the humbug damselfishes inferred from mtDNA sequences. *Journal of Fish Biology* **54**: 1210–1217.
- Briggs JC, Bowen BW. 2012.** A realignment of marine biogeographic provinces with particular reference to fish distributions. *Journal of Biogeography* **39**: 12–30.
- Chesser RT, Zink RM. 1994.** Modes of speciation in birds – a test of Lynch's method. *Evolution* **48**: 490–497.
- Choat JH, Robertson DR. 1975.** Protogynous hermaphroditism in fishes of the family Scaridae. In: Reinboth R, ed. *Intersexuality in the animal kingdom*. Berlin: Springer-Verlag, 263–283.
- Clearmont M, Reid DG, Williams ST. 2011.** Evolution of corallivory in the gastropod genus *Drupella*. *Coral Reefs* **30**: 977–990.
- Coller M. 2009.** SahulTime: rethinking archaeological representation in the digital age. *Archaeologies-Journal of the World Archaeological Congress* **5**: 110–123.
- Cowman PF, Bellwood DR. 2011.** Coral reefs as drivers of cladogenesis: expanding coral reefs, cryptic extinction events, and the development of biodiversity hotspots. *Journal of Evolutionary Biology* **24**: 2543–2562.
- Crandall ED, Sbrocco EJ, DeBoer TS, Barber PH, Carpenter KE. 2012.** Expansion dating: calibrating molecular clocks in marine species from expansions onto the Sunda Shelf following the Last Glacial Maximum. *Molecular Biology and Evolution* **29**: 707–719.
- Crossman DJ, Choat JH, Clements KD. 2005.** Nutritional ecology of nominally herbivorous fishes on coral reefs. *Marine Ecology Progress Series* **296**: 129–142.
- van Doorn GS, Edelaar P, Weissing FJ. 2009.** On the origin of species by natural and sexual selection. *Science* **326**: 1704–1707.

- Drummond AJ, Rambaut A. 2007.** BEAST: Bayesian evolutionary analysis by sampling trees. *BMC Evolutionary Biology* **7**: 214.
- Farias IP, Orti G, Meyer A. 2000.** Total evidence: molecules, morphology and the phylogenetics of cichlid fishes. *Molecular and Developmental Evolution* **288**: 76–92.
- Farias IP, Orti G, Sampaio I, Schneider H, Meyer A. 1999.** Mitochondrial DNA phylogeny of the Family Cichlidae: monophyly and fast molecular evolution of the neotropical assemblage. *Journal of Molecular Evolution* **48**: 703–711.
- Farias IP, Orti G, Sampaio I, Schneider H, Meyer A. 2001.** The cytochrome *b* gene as a phylogenetic marker: the limits of resolution for analyzing relationships among cichlid fishes. *Journal of Molecular Evolution* **53**: 89–103.
- Fitzpatrick JM, Carlon DB, Lippe C, Robertson DR. 2011.** The West Pacific diversity hotspot as a source or sink for new species? Population genetic insights from the Indo-Pacific parrotfish *Scarus rubroviolaceus*. *Molecular Ecology* **20**: 219–234.
- Fulton CJ, Bellwood DR. 2005.** Wave-induced water motion and the functional implications for coral reef fish assemblages. *Limnology and Oceanography* **50**: 255–264.
- Gust N. 2004.** Variation in the population biology of protogynous coral reef fishes over tens of kilometres. *Canadian Journal of Fisheries and Aquatic Sciences* **61**: 205–218.
- Hodge JR, Read CI, Van Herwerden L, Bellwood DR. 2012.** The role of peripheral endemism in species diversification: evidence from the coral reef fish genus *Anampses* (Family: Labridae). *Molecular Phylogenetics and Evolution* **62**: 653–663.
- Huelsenbeck JP, Ronquist F. 2001.** MR BAYES: Bayesian inference of phylogenetic trees. *Bioinformatics* **17**: 754–755.
- Kazancıoğlu E, Alonzo SH. 2010.** A comparative analysis of sex change in Labridae supports the size advantage hypothesis. *Evolution* **64**: 2254–2264.
- Kazancıoğlu E, Near TJ, Hanel R, Wainwright PC. 2009.** Influence of sexual selection and feeding functional morphology on diversification rate of parrotfishes (Scaridae). *Proceedings of the Royal Society of London. Series B, Biological Sciences* **276**: 3439–3446.
- Lessios HA, Robertson DR. 2006.** Crossing the impassable: genetic connections in 20 reef fishes across the eastern Pacific barrier. *Proceedings of the Royal Society of London Series B, Biological Sciences* **273**: 2201–2208.
- Maan ME, Seehausen O. 2011.** Ecology, sexual selection and speciation. *Ecology Letters* **14**: 591–602.
- Malay MCD, Paulay G. 2010.** Peripatric speciation drives diversification and distributional pattern of reef hermit crabs (Decapoda: Diogenidae: Calcinus). *Evolution* **64**: 634–662.
- Marko PB, Hart MW. 2012.** Retrospective coalescent methods and the reconstruction of metapopulation histories in the sea. *Evolutionary Ecology* **26**: 291–315.
- Mellin C, Bradshaw CJA, Meekan MG, Caley MJ. 2010.** Environmental and spatial predictors of species richness and abundance in coral reef fishes. *Global Ecology and Biogeography* **19**: 212–222.
- Miller MA, Holder MT, Vos R, Midford PE, Liebowitz T, Chan L, Hoover P, Warnow T. 2009.** *The CIPRES Portals*. CIPRES. 2009-08-04. URL:[http://www.phylo.org/sub\\_sections/portal](http://www.phylo.org/sub_sections/portal).
- Munday PL, Hodges AL, Choat JH, Gust N. 2004.** Sex-specific growth effects in protogynous hermaphrodites. *Canadian Journal of Fisheries and Aquatic Sciences* **61**: 323–327.
- Network\* TMCS. 2012.** What do we need to know about speciation? *Trends in Ecology & Evolution* **27**: 27–39.
- Nylander JAA. 2004.** *MrModeltest*, Version 2.2. Evolutionary Biology Centre, Uppsala University.
- Nylander JAA, Ronquist F, Huelsenbeck JP, Nieves-Aldrey JL. 2004.** Bayesian phylogenetic analysis of combined data. *Systematic Biology* **53**: 47–67.
- Parenti P, Randall JE. 2000.** An annotated checklist of the species of the Labroid fish families Labridae and Scaridae. *JLBSI Ichthyol Bull* **68**: 1–97.
- Parenti P, Randall JE. 2011.** Checklist of the species of the families Labridae and Scaridae: an update. *Smithiana Bulletin* **13**: 29–44.
- Price SA, Wainwright PC, Bellwood DR, Kazancıoğlu E, Collar DC, Near TJ. 2010.** Functional innovations and morphological diversification in parrotfish. *Evolution* **64**: 3057–3068.
- Quenouille B, Bermingham E, Planes S. 2004.** Molecular systematics of the damselfishes (Teleostei: Pomacentridae): bayesian phylogenetic analyses of mitochondrial and nuclear DNA sequences. *Molecular Phylogenetics and Evolution* **31**: 66–88.
- Quenouille B, Hubert N, Bermingham E, Planes S. 2011.** Speciation in tropical seas: allopatry followed by range change. *Molecular Phylogenetics and Evolution* **58**: 546–552.
- Rambaut A. 1996.** *Se-Al: sequence alignment editor*, Version 2.0. Available at: <http://evolve.zoo.ox.ac.uk>
- Rambaut A. 2009.** *FigTree, tree figure drawing tool*, Version 1.3.1. Institute of Evolutionary Biology, University of Edinburgh.
- Rambaut A, Drummond AJ. 2007.** *Tracer, a MCMC trace analysis tool*, Version 1.4.1. Institute of Evolutionary Biology, University of Edinburgh Available at: <http://beast.bio.ed.ac.uk/>
- Robertson DR, Cramer KL. 2009.** Shore fishes and biogeographic subdivisions of the Tropical Eastern Pacific. *Marine Ecology Progress Series* **380**: 1–17.
- Robertson DR, Karg F, de Moura RL, Victor BC, Bernardi G. 2006.** Mechanisms of speciation and faunal enrichment in Atlantic parrotfishes. *Molecular Phylogenetics and Evolution* **40**: 795–807.
- Robertson DR, Warner RR. 1978.** Sexual patterns in the labroid fishes of the western Caribbean. II. The parrotfishes (Scaridae). *Smithsonian Contributions to Zoology* **255**: 1–26.
- Rocha LA, Bowen BW. 2008.** Speciation in coral-reef fishes. *Journal of Fish Biology* **72**: 1101–1121.
- Rocha LA, Robertson DR, Rocha CR, Van Tassell JL, Craig MT, Bowen BW. 2005.** Recent invasion of the tropical Atlantic by an Indo-Pacific coral reef fish. *Molecular Ecology* **14**: 3921–3928.

- Rosenblatt RH, Hobson ES. 1969.** Parrotfishes (Scaridae) of Eastern Pacific, with a generic rearrangement of Scarinae. *Copeia* **3**: 434–453.
- Russ G. 1984a.** Distribution and abundance of herbivorous grazing fishes in the central Great Barrier Reef. I. Levels of variability across the entire continental shelf. *Marine Ecology Progress Series* **20**: 23–34.
- Russ G. 1984b.** Distribution and abundance of herbivorous grazing fishes in the central Great Barrier Reef. II. Patterns of zonation of mid-shelf and outershelf reefs. *Marine Ecology Progress Series* **20**: 35–44.
- Sallan LC, Friedman M. 2012.** Heads or tails: staged diversification in vertebrate evolutionary radiations. *Proceedings of the Royal Society of London Series B, Biological Sciences* **279**: 2025–2032.
- Sambrook J, Russell DW. 2001.** *Molecular cloning, a laboratory manual*. New York, NY: Cold Spring Harbour Laboratory Press.
- Sanderson MJ. 2002.** Estimating absolute rates of molecular evolution and divergence times: a penalized likelihood approach. *Molecular Biology and Evolution* **19**: 101–109.
- Sanderson MJ. 2004.** *r8s*, Version 1.70. University of California, Davis, CA: Section of Evolution and Ecology.
- Schluter D. 2000.** *The ecology of adaptive radiation*. Oxford: Oxford University Press.
- Smith LL, Fessler JL, Alfaro ME, Streelman JT, Westneat MW. 2008.** Phylogenetic relationships and the evolution of regulatory gene sequences in the parrotfishes. *Molecular Phylogenetics and Evolution* **49**: 136–152.
- Sobel JM, Chen GF, Watt LR, Schemske DW. 2010.** The biology of speciation. *Evolution* **64**: 295–315.
- Spalding MD, Fox HE, Allen GR, Davidson N, Ferdana ZA, Finlayson M, Halpern BS, Jorge MA, Lobama A, Lourie SA, Martin KD, McManus E, Molnar J, Recchia CA, Robertson J.** Marine ecoregions of the world: a bioregionalization of coastal and shelf areas. *Bioscience* **57**: 573–583.
- Streelman JT, Danley PD. 2003.** The stages of vertebrate evolutionary radiation. *Trends in Ecology & Evolution* **18**: 126–131.
- Streelman JT, Karl SA. 1997.** Reconstructing labroid evolution with single-copy nuclear DNA. *Proceedings of the Royal Society of London Series B, Biological Sciences* **264**: 1011–1020.
- Streelman JT, Alfaro M, Westneat MW, Bellwood DR, Karl SA. 2002.** Evolutionary history of the parrotfishes: biogeography, ecomorphology, and comparative diversity. *Evolution* **56**: 961–971.
- Swofford DL. 1998.** *PAUP\* phylogenetic analysis using parsimony (\* and other methods)*, Version 4.0b10. Sunderland, MA: Sinauer Associates, Massachusetts.
- Synetos D, Dabeva MD, Warner JR. 1992.** The yeast ribosomal protein s7 and its genes. *Journal of Biological Chemistry* **267**: 3008–3013.
- Tang KL. 2001.** Phylogenetic relationships among damselfishes (Teleostei: Pomacentridae) as determined by mitochondrial DNA data. *Copeia* **2001**: 591–601.
- Thompson JD, Gibson TJ, Plewniak F, Jeanmougin F, Higgins DG. 1997.** The ClustalX windows interface: flexible strategies for multiple sequence alignment aided by quality analysis tools. *Nucleic Acids Research* **25**: 4876–4882.
- Veron JEN. 1995.** *Corals in space and time: biogeography and evolution of the Scleractinia*. Sydney: UNSW Press.
- Wainwright PC, Bellwood DR, Westneat MW, Grubich JR, Hoey AS. 2004.** A functional morphospace for the skull of labrid fishes: patterns of diversity in a complex biomechanical system. *Biological Journal of the Linnean Society* **82**: 1–25.
- Weir JT, Price TD. 2011.** Limits to speciation inferred from times to secondary sympatry and ages of hybridizing species along a latitudinal gradient. *American Naturalist* **177**: 462–469.
- Westneat MW, Alfaro ME. 2005.** Phylogenetic relationships and evolutionary history of the reef fish family Labridae. *Molecular Phylogenetics and Evolution* **36**: 370–390.

## SUPPORTING INFORMATION

Additional Supporting Information may be found in the online version of this article:

**Table S1.** Species analyzed, localities, and sample ID.

**Table S2.** Primer sequences used (two mitochondrial and one nuclear) in the present study. Primer-specific annealing temperatures ( $T_a$ ) are indicated.

**Table S3.** Range size (km<sup>2</sup>); habitat associations (proportion of range within three categories of reef habitat and the Sunda shelf); NA comprise those species whose distribution does not extend to the vicinity of the Sunda Shelf. Species with ranges that extend over multiple ocean basins are partitioned into Pacific and Indian Ocean distributions.

Please note: Wiley-Blackwell are not responsible for the content or functionality of any supporting materials supplied by the authors. Any queries (other than missing material) should be directed to the corresponding author for the article.
